# Supplementary material for: Assessing the impact of the COVID-19 pandemic on parental satisfaction in two European neonatal intensive care units
Source: PubMed Central journal article supplement — BMJ Paediatr Open. 2022 Sep 20;6(1):e001396. doi: 10.1136/bmjpo-2021-001396 (PMC9490299; doi:10.1136/bmjpo-2021-001396), 2022-09-20
Supplement: bmjpo-2021-001396.draft_revisions.pdf [file bmjpo-2021-001396.draft_revisions.pdf]

# BMJ Paediatrics Open

BMJ Paediatrics Open is committed to open peer review. As part of this commitment we make the peer review history of every article we publish publicly available.

When an article is published we post the peer reviewers' comments and the authors' responses online. We also post the versions of the paper that were used during peer review. These are the versions that the peer review comments apply to.

The versions of the paper that follow are the versions that were submitted during the peer review process. They are not the versions of record or the final published versions. They should not be cited or distributed as the published version of this manuscript.

BMJ Paediatrics Open is an open access journal and the full, final, typeset and author-corrected version of record of the manuscript is available on our site with no access controls, subscription charges or pay-per-view fees (<http://bmjpaedsopen.bmj.com>).

If you have any questions on BMJ Paediatrics Open's open peer review process please email [info.bmjpo@bmj.com](mailto:info.bmjpo@bmj.com)

# BMJ Paediatrics Open

## Assessing the impact of the Covid-19 pandemic on parental satisfaction in two European neonatal intensive care units

|                               |                                                                                                                                                                                                                                                                                                                                                                                                                                                                                                                                                                                                                                                                                                                                                                                                                                                                                                                                                                                                                                                                                          |
|-------------------------------|------------------------------------------------------------------------------------------------------------------------------------------------------------------------------------------------------------------------------------------------------------------------------------------------------------------------------------------------------------------------------------------------------------------------------------------------------------------------------------------------------------------------------------------------------------------------------------------------------------------------------------------------------------------------------------------------------------------------------------------------------------------------------------------------------------------------------------------------------------------------------------------------------------------------------------------------------------------------------------------------------------------------------------------------------------------------------------------|
| Journal:                      | <i>BMJ Paediatrics Open</i>                                                                                                                                                                                                                                                                                                                                                                                                                                                                                                                                                                                                                                                                                                                                                                                                                                                                                                                                                                                                                                                              |
| Manuscript ID                 | bmjpo-2021-001396                                                                                                                                                                                                                                                                                                                                                                                                                                                                                                                                                                                                                                                                                                                                                                                                                                                                                                                                                                                                                                                                        |
| Article Type:                 | Original research                                                                                                                                                                                                                                                                                                                                                                                                                                                                                                                                                                                                                                                                                                                                                                                                                                                                                                                                                                                                                                                                        |
| Date Submitted by the Author: | 12-Jan-2022                                                                                                                                                                                                                                                                                                                                                                                                                                                                                                                                                                                                                                                                                                                                                                                                                                                                                                                                                                                                                                                                              |
| Complete List of Authors:     | Zorro, Carolina; King's College Hospital NHS Foundation Trust<br>MacRae, Eva; King's College Hospital NHS Foundation Trust<br>Teresa-Palacio, Marta; Barcelona Clinic University Hospital Biomedical Diagnosis Center, Neonatology Department<br>Williams, Emma E.; King's College London, Department of Women and Children's Health<br>Aldecoa-Bilbao, Victoria; Barcelona Biomedical Research Park, Neonatology Department<br>Bhat, Ravindra; King's College Hospital NHS Foundation Trust, Neonatal Intensive Care Unit<br>Hickey, Ann; King's College Hospital NHS Foundation Trust, Neonatal Intensive Care Unit<br>Dassios, Theodore; King's College London, Department of Women and Children's Health, School of Life Sciences, Faculty of Life Science and Medicine; King's College Hospital NHS Foundation Trust, Neonatal Intensive Care Centre<br>Greenough, Anne; King's College London, Department of Women and Children's Health, School of Life Sciences, Faculty of Life Science and Medicine; King's College London, Asthma UK Centre for Allergic Mechanisms in Asthma |
| Keywords:                     | COVID-19, Neonatology                                                                                                                                                                                                                                                                                                                                                                                                                                                                                                                                                                                                                                                                                                                                                                                                                                                                                                                                                                                                                                                                    |
|                               |                                                                                                                                                                                                                                                                                                                                                                                                                                                                                                                                                                                                                                                                                                                                                                                                                                                                                                                                                                                                                                                                                          |

SCHOLARONE™  
Manuscripts

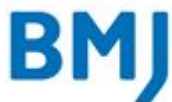

I, the Submitting Author has the right to grant and does grant on behalf of all authors of the Work (as defined in the below author licence), an exclusive licence and/or a non-exclusive licence for contributions from authors who are: i) UK Crown employees; ii) where BMJ has agreed a CC-BY licence shall apply, and/or iii) in accordance with the terms applicable for US Federal Government officers or employees acting as part of their official duties; on a worldwide, perpetual, irrevocable, royalty-free basis to BMJ Publishing Group Ltd ("BMJ") its licensees and where the relevant Journal is co-owned by BMJ to the co-owners of the Journal, to publish the Work in this journal and any other BMJ products and to exploit all rights, as set out in our [licence](#).

The Submitting Author accepts and understands that any supply made under these terms is made by BMJ to the Submitting Author unless you are acting as an employee on behalf of your employer or a postgraduate student of an affiliated institution which is paying any applicable article publishing charge ("APC") for Open Access articles. Where the Submitting Author wishes to make the Work available on an Open Access basis (and intends to pay the relevant APC), the terms of reuse of such Open Access shall be governed by a Creative Commons licence – details of these licences and which [Creative Commons](#) licence will apply to this Work are set out in our licence referred to above.

Other than as permitted in any relevant BMJ Author's Self Archiving Policies, I confirm this Work has not been accepted for publication elsewhere, is not being considered for publication elsewhere and does not duplicate material already published. I confirm all authors consent to publication of this Work and authorise the granting of this licence.

1  
2  
3 **Assessing the impact of the Covid-19 pandemic on parental satisfaction in two**  
4  
5 **European neonatal intensive care units**  
6  
7  
8  
9

10 Carolina Zorro<sup>1</sup>, Eva MacRae<sup>1</sup>, Marta Teresa-Palacio<sup>5</sup>, Emma E. Williams<sup>2</sup>, Victoria  
11  
12 Aldecoa-Bilbao<sup>5</sup>, Ravindra Bhat<sup>1</sup>, Ann Hickey<sup>1</sup>, Theodore Dassios<sup>1,2</sup> and Anne  
13  
14 Greenough<sup>2,3,4</sup>  
15  
16  
17  
18

19 <sup>1</sup> Neonatal Intensive Care Centre, King's College Hospital NHS Foundation Trust,  
20  
21 London, United Kingdom  
22

23 <sup>2</sup> Department of Women and Children's Health, School of Life Course Sciences,  
24  
25 Faculty of Life Sciences and Medicine, King's College London, United Kingdom  
26  
27

28 <sup>3</sup> Asthma UK Centre for Allergic Mechanisms in Asthma, King's College London,  
29  
30 United Kingdom  
31

32 <sup>4</sup> NIHR Biomedical Research Centre based at Guy's and St Thomas' NHS  
33  
34 Foundation Trust and King's College London, United Kingdom  
35  
36

37 <sup>5</sup> Neonatology Department, Hospital Clinic Barcelona. BCNatal (Barcelona Center for  
38  
39 Maternal-Foetal and Neonatal Medicine), Barcelona, Spain  
40  
41  
42  
43  
44  
45  
46

47 Corresponding author: Carolina Zorro. Neonatal Intensive Care Centre, 4th Floor  
48  
49 Golden Jubilee Wing, King's College Hospital, Denmark Hill, London, SE5 9RS,  
50  
51 United Kingdom. Tel: +44 0203 299 8744 ; E-mail: [carolina.zorro@nhs.net](mailto:carolina.zorro@nhs.net)  
52  
53  
54  
55  
56

57 **Word count:** 2874

58 **Key words:** Covid-19; parental satisfaction; neonatal care  
59  
60

## ABSTRACT

**Background:** Neonatal units across the world have altered their policies to prevent the spread of infection during the Covid-19 pandemic. Our aim was to evaluate the impact of the pandemic on the experience of parents with newborns admitted to two tertiary neonatal intensive care units.

**Methods:** Parents of infants admitted to each neonatal unit were asked to complete a questionnaire regarding their experience during the Covid-19 pandemic. At Kings College Hospital, UK (KCH) data were collected prospectively between June 2020 and August 2020 (first wave). At the Hospital Clínic Barcelona (BCN) data were collected retrospectively from parents whose infants were admitted between September 2020 and February 2021 (second and third wave).

**Results:** A total of 74 questionnaires were completed (38 from KCH and 36 from BCN). The parents reported that they were fully involved or involved in the care of their infants in 89.4% of the responses in KCH and 91.6% in BCN. Quality time spent with infants during the pandemic was more negatively affected at KCH compared to BCN (63.2% versus 33.3%;  $p=0.01$ ). Parents felt either satisfied or very satisfied with the updates from the clinical care team in 79.0% of the responses at KCH and 83.4% in BCN. The parents felt that the restrictions negatively affected breastfeeding in 15.8% of the responses at KCH and 5.2% in BCN. Travelling to the hospital was reported overall to be sometimes difficult (39.2%), this did not differ significantly between the two units ( $p=0.826$ ). Furthermore, the self-reported amount of time spent giving kangaroo care did not differ significantly between the two countries ( $p=0.05$ ).

1  
2  
3 **Conclusion:** Restrictive visiting policies implemented due to the Covid-19 pandemic  
4  
5 had a negative impact in perception of quality of time spent by parents with their  
6  
7 newborns admitted to neonatal units.  
8  
9  
10  
11  
12  
13  
14  
15  
16  
17  
18  
19  
20  
21  
22  
23  
24  
25  
26  
27  
28  
29  
30  
31  
32  
33  
34  
35  
36  
37  
38  
39  
40  
41  
42  
43  
44  
45  
46  
47  
48  
49  
50  
51  
52  
53  
54  
55  
56  
57  
58  
59  
60

Confidential: For Review Only

## INTRODUCTION

The COVID-19 pandemic forced health care systems worldwide to introduce mitigating measures to reduce the impact of the disease. One of the recommendations was that “numbers of visitors and visiting periods should be highly restricted”.<sup>[1]</sup> The Royal College of Paediatrics and Child Health (RCPCH) and the British Association of Perinatal Medicine (BAPM) issued guidance to aid policy makers.<sup>[2]</sup> In response, many neonatal intensive care units amended their unit policies to maintain the safety of infants, parents and clinical staff, whilst continuing to promote family integrated care. The universal responses by most healthcare organisations in imposing restrictions particularly in the early stages, however, often did not consider the unique situation that arises with the newborn mother-baby dyad. A recent review suggested that the restrictions implemented by neonatal units during the Covid-19 pandemic increased parent and infant separation and subsequently reduced the establishment of successful breast-feeding.<sup>[3]</sup> Furthermore, a joint UK and US survey of parental perceptions on visiting restrictions during the pandemic highlighted that parents reported reduced involvement and bonding experiences with their infant.<sup>[4]</sup> Those findings, together with baseline risks already associated with the perinatal and postnatal periods, could worsen long-term parental mental health when the heightened general anxiety around the pandemic is considered.<sup>[5]</sup> Indeed, parents report visiting restrictions limit their ability to bond and participate in their infant’s care, with concern expressed about receiving insufficient information and medical updates due to restrictions limiting ward round attendance.<sup>[4, 6, 7]</sup> Furthermore parents described having unmet requirements for emotional and psychological support and facing difficulties with transport, work and medical expenses following discharge.<sup>[8]</sup>

1  
2  
3 The aim of this current study was to assess the effect of the pandemic on parental  
4 experience within two neonatal intensive care units in Europe. Specifically, we  
5 wanted to explore common themes experienced by families with infants admitted to  
6 intensive care during the pandemic in two healthcare settings in Europe.  
7  
8  
9  
10  
11  
12  
13

## 14 **METHODS**

### 15 **London (KCH)**

16  
17 The neonatal unit at King's College Hospital NHS Foundation Trust (London, UK) is  
18 a tertiary medical and surgical neonatal unit with an average of 700 annual  
19 admissions. It has a total bed capacity of 36, including 12 intensive care cots, 12  
20 high dependency care cots, 12 special care cots and an isolation room. In 2020,  
21 there were 4,266 births with 575 infants admitted to the neonatal unit (13.4%), which  
22 was the lowest admission rate in the last 10 years. Of all the admissions 194 (33.7%)  
23 required intensive care, 261 (45.4%) were preterm <37 weeks and 100 (17.4%)  
24 weighed less than 1500 grams. Parent facilities on-site include a coffee room and a  
25 rest area with one rooming-in room. Pre-pandemic visiting policy allowed both  
26 parents, grandparents, siblings and other family members to visit, with two adults at  
27 the cot-side at any one time. Changes to the unit policy at King's College Hospital  
28 during the Covid-19 pandemic were introduced in March 2020 following  
29 recommendations from the Royal College of Paediatrics and Child Health (RCPCH)  
30 and British Association of Perinatal Medicine (BAPM). Only one parent could visit  
31 their baby at a time and no siblings (except twins) or other family members could  
32 visit. The parents' facilities including coffee room, rest area and rooming-in room  
33 were closed and parents were advised not to congregate in the reception area.  
34  
35 Further, parents were advised to practice social distancing and to always wear face  
36  
37  
38  
39  
40  
41  
42  
43  
44  
45  
46  
47  
48  
49  
50  
51  
52  
53  
54  
55  
56  
57  
58  
59  
60



1  
2  
3 masks as per Government guidance. The unit continued to remain open for  
4  
5 restrictive visiting 24/7. Parents were only able to spend time by their own infant's  
6  
7 cot-side and advised to bring a separate shirt with them to the unit for kangaroo care.  
8  
9  
10 A maximum of four mothers were allowed in the expressing room. Parental craft  
11  
12 skills and cares such as kangaroo care, nappy changes, skin care, feeding, bathing  
13  
14 the baby and temperature measurements were all still actively encouraged.  
15  
16  
17 Furthermore, breast feeding support continued to be available every day of the  
18  
19 week. When parents had to self-isolate, videocalls were arranged daily so they could  
20  
21 see their baby. During the study period, there were no Covid-positive cases in infants  
22  
23 admitted to the unit, but three parents tested positive for coronavirus and had to self-  
24  
25 isolate.  
26  
27  
28  
29  
30

### 31 **Barcelona (BCN)**

32  
33 The neonatal unit at Hospital Clínic Barcelona (Barcelona, Spain) is a tertiary  
34  
35 neonatal unit with an average of 550 annual admissions. It has a total bed capacity  
36  
37 of 28 including eight intensive care cots, eight high dependency care cots and 12  
38  
39 special care cots. In 2020, there were 3,295 births with 452 infants admitted to the  
40  
41 neonatal unit (13.7%). From all the neonatal admissions, 211 (46.7%) required  
42  
43 intensive care, 347 (76.7%) were preterm infants (<37 weeks) and 83 (23.9%)  
44  
45 weighed less than 1500 grams. Parent facilities on-site include a coffee room and  
46  
47 rest area and there are 15 live video cameras available in the unit for families to see  
48  
49 their infant when unable to visit. Pre-pandemic visiting policy allowed both parents,  
50  
51 grandparents and siblings to enter the unit in groups of two people each time and the  
52  
53 unit remained opened 24/7. From March 2020, following the Spanish Society of  
54  
55 Neonatology (*Sociedad Española de Neonatología*) (SENEO) recommendations to  
56  
57  
58  
59  
60

1  
2  
3 prevent the spread of COVID-19 infection, a restrictive visiting policy was  
4  
5 implemented. Only parents could visit their baby, one at a time, and they were  
6  
7 required to wear a face mask at all times whilst on the unit. The parent facilities  
8  
9 remained opened 24/7 but only one family could visit the parent room at any one  
10  
11 time. From June 2020, a less restrictive visiting policy was implemented and both  
12  
13 parents could visit their baby simultaneously, providing they did not have any  
14  
15 coronavirus symptoms and had not been in contact with any person who had tested  
16  
17 positive. There were no Covid-positive cases in babies admitted to the unit or their  
18  
19 parents during the study period.  
20  
21  
22  
23  
24  
25

### 26 **Questionnaire completion**

27  
28 Parents of infants admitted to Kings College Hospital, UK (KCH) neonatal intensive  
29  
30 care unit were asked to complete a questionnaire prospectively regarding their  
31  
32 experience during the Covid-19 pandemic. The parents received a written  
33  
34 questionnaire and completed this when visiting their infant. Parents of infants  
35  
36 admitted to the Hospital Clinic, Barcelona (BCN) neonatal intensive care unit were  
37  
38 asked retrospectively to complete the same questionnaire which were sent online  
39  
40 through an app utilised by the hospital which meets legal requirements of  
41  
42 confidentiality. One questionnaire was given to each household and the responses  
43  
44 from both countries were anonymised. Parents were eligible to complete the survey  
45  
46 if their infant was admitted to the neonatal unit for at least one week. Parents of  
47  
48 infants receiving palliative care were excluded from the study. The questionnaire  
49  
50 contained only six questions aimed at assessing parental experience during the  
51  
52 pandemic, and hence would be rapid and burden free for parents to complete. The  
53  
54 questionnaire considered specific Covid-19 guidance laid out by the RCPCH, BAPM,  
55  
56  
57  
58  
59  
60

1  
2  
3 SENE0 and the neonatal charity Bliss. Furthermore, parents were also requested to  
4  
5 give free text recommendations as to how the service could be improved during the  
6  
7 pandemic.  
8  
9

10  
11  
12 At KCH data were collected prospectively over a six-week period, between 25<sup>th</sup> June  
13  
14 2020 to 5<sup>th</sup> August 2020 (first wave). At BCN the data were collected retrospectively  
15  
16 from parents whose infants were admitted between 22<sup>nd</sup> September 2020 to 28<sup>th</sup>  
17  
18 February 2021 (second and third wave) and when less restrictive visiting policies  
19  
20 were in place. Differences in parental experience between the two neonatal units  
21  
22 were compared for statistical significance using the Mann Whitney U test and  
23  
24 analysed using SPSS version 26.  
25  
26  
27  
28  
29  
30

### 31 **Patient and Public Involvement**

32  
33  
34  
35 It was not appropriate or possible to involve patients or the public in the design, or  
36  
37 conduct, or reporting, or dissemination plans of our research due to the unpredicted  
38  
39 nature of the Covid pandemic and associated restrictions.  
40  
41  
42  
43  
44  
45  
46  
47  
48  
49

### 50 **RESULTS**

51  
52 A total of 74 questionnaires were analysed, 38 from KCH and 36 from BCN. Just  
53  
54 over half of the parents felt fully involved with the care of their infant (58.1%),  
55  
56 however this was larger in BCN compared to KCH (72.2% versus 44.7%;  $p=0.027$ ).  
57  
58 Quality time spent with infants during the pandemic was more negatively affected in  
59  
60

1  
2  
3 KCH compared to BCN (63.2% versus 33.3%;  $p=0.01$ ). For both countries, 59.5% of  
4  
5 responders reported the pandemic did not affect the time spent breastfeeding, and  
6  
7 62.2% reported giving Kangaroo Care was mostly unchanged. Parents from both  
8  
9 units were satisfied with clinical updates from medical and nursing staff throughout  
10  
11 the pandemic. Travelling back and forth to the hospital to visit their infant was  
12  
13 reported overall to be sometimes difficult (39.2%), however this was no different in  
14  
15 either country ( $p=0.826$ ).  
16  
17  
18  
19  
20

21  
22 The questionnaire incorporated a section where parents could write comments about  
23  
24 their experience in the neonatal unit, including any suggestions they had to improve  
25  
26 this.  
27  
28  
29

### 30 31 **KCH comments**

32  
33 Many parents expressed concern over the visiting restrictions as they worried it  
34  
35 would impact on how often they would be able to see their baby and bond with them,  
36  
37 although they appreciated the reasons for this. There were mothers who described  
38  
39 having less time with their baby so that the fathers could also visit. Some parents  
40  
41 described the impact it had on their emotional well-being as well as mental health  
42  
43 and wishing their partner could be present to support them. Difficulties were  
44  
45 expressed balancing home life with frequent visits to the hospital, especially with  
46  
47 siblings or twins at home. Single parents requested being able to nominate a family  
48  
49 member to provide additional support. A comment was made that opportunities to  
50  
51 express breast milk were affected by limited spaces in the expressing room due to  
52  
53 the need for social distancing. One parent also felt that having less time with the  
54  
55 baby reduced feeding opportunities. A few parents voiced that although wearing a  
56  
57  
58  
59  
60

1  
2  
3 face mask was understandable, it also made bonding difficult. They expressed  
4  
5 feeling “sad” that their baby had never seen them without a mask. Parents worried  
6  
7 that not being able to read their facial expressions might have consequences for the  
8  
9 baby’s development. A suggestion was made asking if doctors could offer regular  
10  
11 conference calls to allow parents to discuss the medical care of their baby together.  
12  
13 Overall, parents were very happy and thankful for the clinical care and continuous  
14  
15 support provided, despite the challenges of the pandemic.  
16  
17  
18  
19  
20

### 21 **BCN comments**

22  
23 The quality of time parents spent with their infant was reported by one family to have  
24  
25 been negatively affected by the pandemic, mostly by the wearing of face masks  
26  
27 which did not allow the parents to kiss their baby. Furthermore, quality of time was  
28  
29 reported to be reduced by not being able to have other family members visit their  
30  
31 infant. Parents did however report finding it particularly exciting seeing their infant’s  
32  
33 name coloured on the wall next to their incubator and being able to use cameras to  
34  
35 see them at any time.  
36  
37  
38  
39  
40  
41

### 42 **DISCUSSION**

43  
44 We demonstrate that parents reported the overall quality of time spent with their  
45  
46 infant to be reduced, especially when more restrictive policies were in place. This  
47  
48 may also be related to the difficulties in travel to the hospital. Concerns were  
49  
50 highlighted about parental emotional wellbeing, feelings of anxiety, bonding as a  
51  
52 family and lack of support from partners.  
53  
54

55  
56 We considered why variation in parental satisfaction between the two countries may  
57  
58 exist. Anxiety and apprehension during the first wave was high, with rates of major  
59  
60

1  
2  
3 depressive symptoms in pregnant women within the UK peaking at 42%,<sup>[9]</sup>  
4  
5 compared to a lower proportion in Spain reporting such symptoms (38%).<sup>[10]</sup> In our  
6  
7 study parents with infants admitted to neonatal intensive care were asked to respond  
8  
9 to the questionnaire during different waves of the pandemic. We speculate that the  
10  
11 higher levels of self-reported quality time spent with infants and overall greater  
12  
13 parental satisfaction in Barcelona than the UK may be secondary to previously  
14  
15 reported lower baseline rates of depressive symptoms in pregnancy within the  
16  
17 Spanish population. More so, parents in the UK were also asked to complete the  
18  
19 questionnaire when visiting was most restrictive. Such differences in self-reported  
20  
21 parental satisfaction within our study agree with a recent UK and US survey which  
22  
23 explored varying policies between units, with a greater negative parental impact  
24  
25 identified during stricter restrictions.<sup>[7]</sup>  
26  
27  
28  
29  
30  
31  
32

33 Muniraman and colleagues conducted a cross-sectional survey of parents impacted  
34  
35 by visitation policies in six tertiary neonatal units, from the UK and the USA  
36  
37 assessing their visitation policies and impact on parents' ability to visit, care for and  
38  
39 bond with their infants. In a total of 231 responses they reported that the visitation  
40  
41 policies were perceived as restrictive by 62% of the respondents and 41% reporting  
42  
43 being unable to bond enough. Mild to severe impact on breast feeding was reported  
44  
45 by 36% (75/209) of respondents. Our study generally agrees with the above findings  
46  
47 and complements the literature by reporting on two separate populations in two  
48  
49 European countries with the Barcelona cohort coming later in time in the pandemic  
50  
51 (up to February 2021 compared to August in 2020 in Muniraman et al.<sup>[7]</sup>  
52  
53  
54  
55  
56

57 When considering important outcome related factors however, our questionnaire  
58  
59 highlights that many parents within both the UK and Spain do not report a significant  
60

1  
2  
3 reduction in time spent breast-feeding or provision of kangaroo care. Furthermore,  
4  
5 parental satisfaction in receiving medical updates was not affected regardless of  
6  
7 which pandemic restriction policy was employed.  
8  
9

10  
11 Less restrictive measures were in place during completion of the questionnaire in  
12  
13 Barcelona, when both parents were able to visit their infant. Having both parents at  
14  
15 the cot-side together may have facilitated kangaroo care, family-integrated care and  
16  
17 receiving joint medical updates to both parents simultaneously.  
18  
19

20  
21 There were many comments made in our study regarding the impact on parental  
22  
23 emotional wellbeing. It is crucial that health professionals remain vigilant in  
24  
25 identifying parents who require additional emotional support and sign posting them to  
26  
27 appropriate organisations.  
28  
29

30  
31 The availability of live video cameras within the neonatal unit in Spain for when  
32  
33 parents were unable to visit their infant may have been vital in parents feeling more  
34  
35 involved with the care of the infant despite not being physical present. Our survey  
36  
37 highlights the importance of incorporating different modalities into our clinical care  
38  
39 such as telephone conferencing and secure video messaging. Indeed, one study  
40  
41 reported that asynchronous video messaging supported models of family integrated  
42  
43 care, improved parental experience and emotional closeness to their baby and built  
44  
45 strong relationships between families and staff.[11] Furthermore, the use of cot-side  
46  
47 cameras has been associated with a reduction in parental stress when infant  
48  
49 separation occurs.[12] Such advancements in technology may thus be beneficial not  
50  
51 only during future pandemics, but also in the provision and delivery of universal,  
52  
53 sustainable and accessible neonatal care.  
54  
55  
56  
57  
58  
59  
60

1  
2  
3 Utilisation of digital innovations as a standard of care when considering service  
4 provision and re-design of units may indeed remove some of the barriers and  
5 obstacles often currently experienced by parents and health care workers in being  
6 able to provide and promote family integrated care, and thus such advances may be  
7 a beneficial side-product of the pandemic.[13-15]  
8  
9

10  
11  
12  
13  
14  
15  
16 Mask wearing is a highly effective measure in reducing virus transmission at a  
17 population level.[16] The use of face masks was a recurring theme expressed by  
18 parents from both the UK and Spain. Wearing of face masks by parents whilst with  
19 their infant was identified as a particular source of anxiety in both countries with  
20 concern over the impact upon bonding. Indeed, there is little knowledge of this with  
21 respect to the longer-term consequences on infant neurodevelopment. Wearing of  
22 face masks may affect attachment processes between parents and their infant within  
23 the first few days of life when there is little exposure to and visualisation of parental  
24 facial expressions.[17] Suggested recommendations from the RCPCH with specific  
25 regard to face mask coverings is that consideration for removal should be given for  
26 asymptomatic parents when providing kangaroo care.[18] Furthermore, use of  
27 transparent facemasks or visors, alongside regularly talking through the mask,  
28 should be encouraged to enable bonding and attachment opportunities.[19] Balance  
29 of risk must be made however between the unknown adverse impact of face  
30 coverings on infant neurodevelopment with the global benefits of face masks in  
31 reducing virus transmission.  
32  
33  
34  
35  
36  
37  
38  
39  
40  
41  
42  
43  
44  
45  
46  
47  
48  
49  
50  
51

52 This study has strengths and some limitations. We have surveyed parents from two  
53 tertiary neonatal intensive care units in Europe incorporating two different policies on  
54 parental visiting during the Covid-19 pandemic. Answers from both cohorts of  
55 parents, with different visiting restrictions, may therefore be useful in guiding further  
56  
57  
58  
59  
60



1  
2  
3 visiting policies in future pandemics to ensure parental satisfaction is taken into  
4 consideration. Data were collected from KCH during the first wave of the pandemic  
5 when lock down restrictions were being enforced, thereby capturing an accurate  
6 depiction of parental experience in real time. Contrary to this, data from BCN were  
7 collected retrospectively and when less restrictive visiting policies were in place, and  
8 as such may have positively impacted the reflections of parents who were at home  
9 when completing the form. Furthermore, we did not however have survey responses  
10 to assess baseline perception and involvement in care pre-pandemic and thus how  
11 self-reported parental satisfaction may have changed within each country when  
12 visiting restrictions and policies were implemented.  
13  
14  
15  
16  
17  
18  
19  
20  
21  
22  
23  
24  
25

26 The long-term impact of the pandemic upon parents and infants admitted to neonatal  
27 care is not known.  
28  
29  
30  
31  
32

33 In conclusion, restrictive visiting policies implemented due to the Covid-19 pandemic  
34 have affected families with infants admitted to neonatal intensive care. Quality of  
35 time spent with the babies was felt to be significantly affected, especially when more  
36 restrictive visiting policies were implemented. Parental involvement in the care of  
37 their babies and satisfaction with the care that infants received and with medical and  
38 nursing updates, however, remained positive. The amount of time spent  
39 breastfeeding and giving Kangaroo Care decreased during the pandemic, but was  
40 not significantly different between the two units  
41  
42  
43  
44  
45  
46  
47  
48  
49  
50  
51  
52  
53  
54  
55  
56  
57  
58  
59  
60

## ACKNOWLEDGEMENTS

**Funding statement:** This research was supported by the National Institute for Health Research (NIHR) Biomedical Research Centre at Guy's and St Thomas' NHS Foundation Trust and King's College London. The views expressed are those of the authors and not necessarily those of the NHS, the NIHR or the Department of Health.

**Competing interest statement:** The authors have no conflict of interest to declare

### Authors contribution:

Carolina Zorro designed the study, participated in the analysis of data and the writing of the manuscript

Eva MacRae participated in the design of the study, data acquisition, participated in the analysis and critically revised the manuscript

Marta Teresa-Palacio acquired the data from BCN, participated in the analysis and critically reviewed the manuscript

Emma E. Williams participated in the analysis of data and the writing of the manuscript

Victoria Aldecoa-Bilbao acquired the data from BCN, participated in the analysis and critically reviewed the manuscript

Ravindra Bhat participated in the design of the study and critically reviewed the manuscript

Ann Hickey participated in the design of the study and critically reviewed the manuscript

Theodore Dassios participated in the analysis of data and the writing of the manuscript

1  
2  
3 Anne Greenough supervised the project, participated in the design and  
4  
5 analysis of the study and critically revised the manuscript  
6  
7  
8  
9

10 **Data sharing statement:** Data will be shared on reasonable request

11  
12 **Patient consent:** All parents consented to take part in the survey  
13  
14  
15  
16  
17  
18  
19  
20  
21  
22  
23  
24  
25  
26  
27  
28  
29  
30  
31  
32  
33  
34  
35  
36  
37  
38  
39  
40  
41  
42  
43  
44  
45  
46  
47  
48  
49  
50  
51  
52  
53  
54  
55  
56  
57  
58  
59  
60

Confidential: For Review Only

### What is known about the subject

- The COVID-19 pandemic has led to restrictive visiting policies across neonatal units.
- Visiting policies varied between centers and over time, being stricter at the beginning of the pandemic.

### What this study adds

- Despite the restrictive visiting policies implemented satisfaction with the care that infants received and with medical updates remained positive.
- Overall time spent in breastfeeding and in Kangaroo Care was affected by the pandemic but there were no significant differences between different visiting policies.
- The use of facemasks generates parental anxiety and difficulties in bonding with their babies.

## REFERENCES

1. Organisation WH. Maintaining essential health services: operational guidance for the COVID-19 context interim guidance. 2020. p. 61.
2. Neonatologia SEd. Recommendations for management of newborns for SARS-CoV-2 infection. In: Neonatology SSo, editor. 2020. p. 16.
3. van Veenendaal NR, Deierl A, Bacchini F, et al. International Steering Committee for Family Integrated C. Supporting parents as essential care partners in neonatal units during the SARS-CoV-2 pandemic. *Acta Paediatr* 2021;**110**:2008-22.
4. Brown A, Shenker N. Experiences of breastfeeding during COVID-19: Lessons for future practical and emotional support. *Matern Child Nutr* 2021;**17**:e1388.
5. Ashini A, Alsoufi A, Elhadi M. Parental perception of neonatal ICU visitation during the COVID-19 pandemic. *Int J Gynaecol Obstet* 2021;**153**:554-5.
6. Darcy Mahoney A, White RD, Velasquez A, et al. Impact of restrictions on parental presence in neonatal intensive care units related to coronavirus disease 2019. *J Perinatol* 2020;**40**:36-46.
7. Muniraman H, Ali M, Cawley P, et al. Parental perceptions of the impact of neonatal unit visitation policies during COVID-19 pandemic. *BMJ Paediatr Open* 2020;**4**:e000899.
8. Fan J, Zhou M, Wei L, et al. A qualitative study on the psychological needs of hospitalized newborns' parents during COVID-19 outbreak in China. *Iran J Pediatr* 2020;**30**:e102748.

- 1  
2  
3 9. Ceulemans M, Foulon V, Ngo E, et al. Mental health status of pregnant and  
4 breastfeeding women during the COVID-19 pandemic-A multinational cross-  
5 sectional study. *Acta Obstet Gynecol Scand* 2021;**100**:1219-29.  
6  
7  
8  
9  
10  
11 10. Brik M, Sandonis MA, Fernandez S, et al. Psychological impact and social  
12 support in pregnant women during lockdown due to SARS-CoV2 pandemic: A cohort  
13 study. *Acta Obstet Gynecol Scand* 2021;**100**:1026-33.  
14  
15  
16  
17  
18  
19 11. Kirolos S, Sutcliffe L, Giatsi Clausen M, et al. Asynchronous video messaging  
20 promotes family involvement and mitigates separation in neonatal care. *Arch Dis*  
21 *Child Fetal Neonatal Ed* 2021;**106**:172-7.  
22  
23  
24  
25  
26  
27 12. Guttman K, Patterson C, Haines T, et al. Parent stress in relation to use of  
28 bedside telehealth, an initiative to improve family-centeredness of care in the  
29 neonatal intensive care unit. *J Patient Exp* 2020;**7**:1378-83.  
30  
31  
32  
33  
34  
35 13. MacSween K, Fraser C, Clinton T, et al. Neonatal healthcare workers'  
36 perceptions of the impact of the COVID-19 pandemic. *Acta Paediatr* 2021;**110**:2814-  
37  
38  
39 6.  
40  
41  
42  
43 14. Waddington C, van Veenendaal NR, O'Brien K, et al. International Steering  
44 Committee for Family Integrated C. Family integrated care: Supporting parents as  
45 primary caregivers in the neonatal intensive care unit. *Pediatr Investig* 2021;**5**:148-  
46  
47  
48  
49 54.  
50  
51  
52  
53 15. Campbell-Yeo M, Dol J, Richardson B, et al. A co-design of clinical virtual  
54 care pathways to engage and support families requiring neonatal intensive care in  
55 response to the COVID-19 pandemic (COVES study). *J Neonatal Nurs* 2021 [Epub  
56  
57  
58  
59 ahead of print].  
60

- 1  
2  
3 16. Howard J, Huang A, Li Z, et al. An evidence review of face masks against  
4 COVID-19. *Proc Natl Acad Sci USA* 2021;**118**: e2014564118.  
5  
6  
7  
8  
9 17. Green J, Staff L, Bromley P, et al. The implications of face masks for babies  
10 and families during the COVID-19 pandemic: A discussion paper. *J Neonatal Nurs*  
11 2021;**27**:21-5.  
12  
13  
14  
15  
16 18. Health RCoPaC. BAPM - COVID-19: Frequently asked questions within  
17 neonatal services. In: RCPCH, editor. 2021.  
18  
19  
20  
21  
22 19. Verd S, Moll P, Serra C, et al. Mothers' masks should be improved or  
23 removed during pandemic as they inhibit bonding with neonates. *Acta Paediatr*  
24 2021;**110**(5):1689.  
25  
26  
27  
28  
29  
30  
31  
32  
33  
34  
35  
36  
37  
38  
39  
40  
41  
42  
43  
44  
45  
46  
47  
48  
49  
50  
51  
52  
53  
54  
55  
56  
57  
58  
59  
60

## FIGURE LEGENDS

**Figure 1:** Parental involvement in the care of their babies

**Figure 2:** Effect of the pandemic in the quality of time spend with their babies

**Figure 3:** Effect of the pandemic in the amount of time spend giving Kangaroo Care

**Figure 4:** Effect of the pandemic in the amount of time spend breastfeeding

**Figure 5:** Parental satisfaction with the updates from the medical and nursing staff regarding their babies

**Figure 6:** Parental difficulties in commuting to the hospital



1  
2  
3  
4  
5  
6  
7  
8  
9  
10  
11  
12  
13  
14  
15  
16  
17  
18  
19  
20  
21  
22  
23  
24  
25  
26  
27  
28  
29  
30  
31  
32  
33  
34  
35  
36  
37  
38  
39  
40  
41  
42  
43  
44  
45  
46  
47  
48  
49  
50  
51  
52  
53  
54  
55  
56  
57  
58  
59  
60

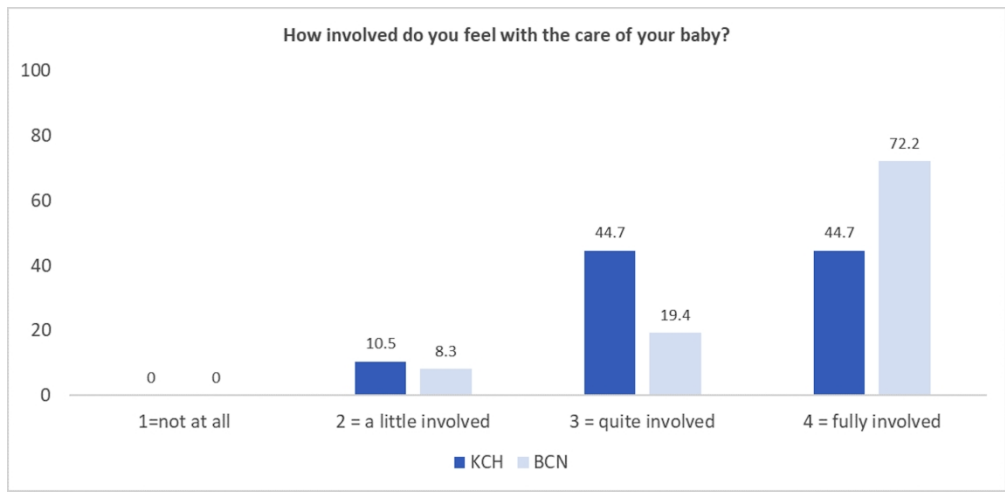

192x93mm (300 x 300 DPI)

1  
2  
3  
4  
5  
6  
7  
8  
9  
10  
11  
12  
13  
14  
15  
16  
17  
18  
19  
20  
21  
22  
23  
24  
25  
26  
27  
28  
29  
30  
31  
32  
33  
34  
35  
36  
37  
38  
39  
40  
41  
42  
43  
44  
45  
46  
47  
48  
49  
50  
51  
52  
53  
54  
55  
56  
57  
58  
59  
60

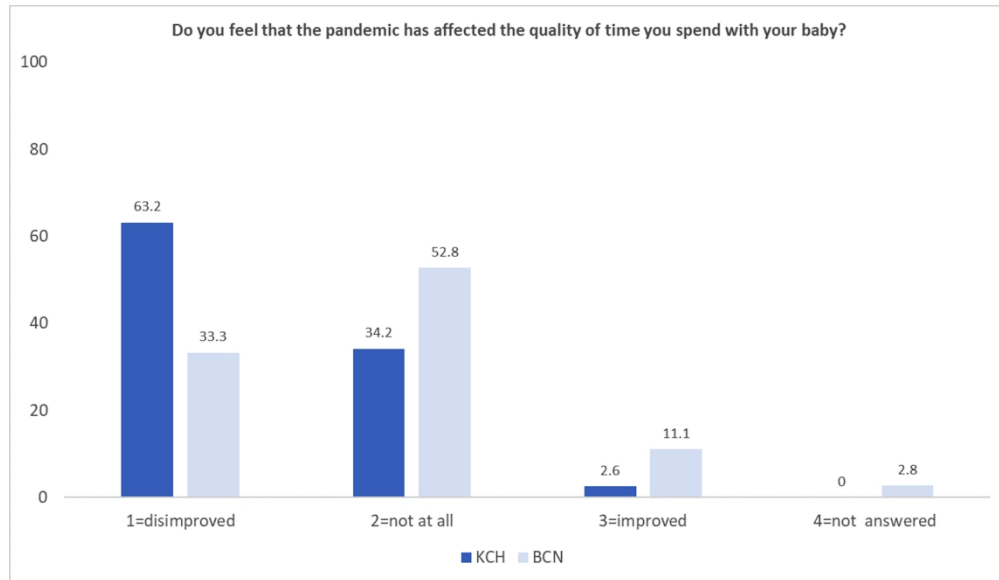

214x124mm (300 x 300 DPI)

1  
2  
3  
4  
5  
6  
7  
8  
9  
10  
11  
12  
13  
14  
15  
16  
17  
18  
19  
20  
21  
22  
23  
24  
25  
26  
27  
28  
29  
30  
31  
32  
33  
34  
35  
36  
37  
38  
39  
40  
41  
42  
43  
44  
45  
46  
47  
48  
49  
50  
51  
52  
53  
54  
55  
56  
57  
58  
59  
60

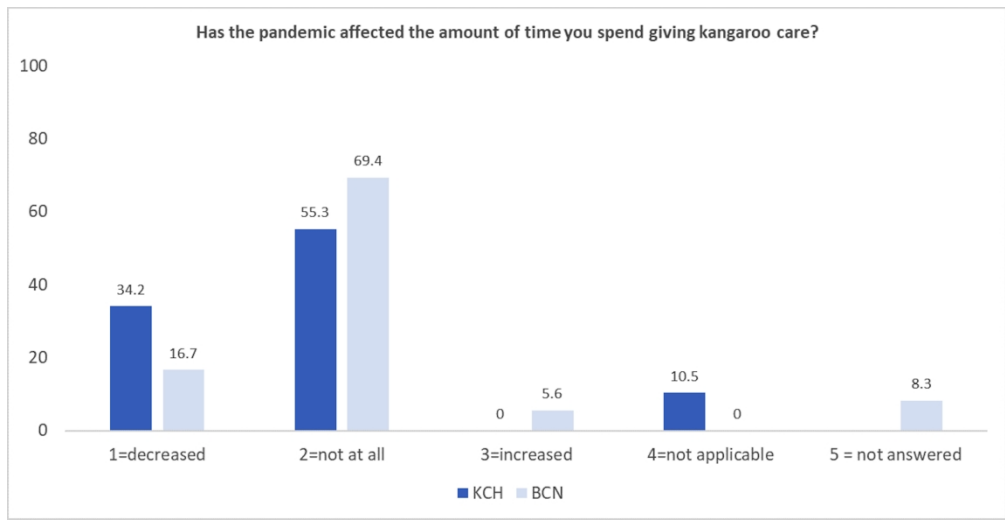

207x106mm (300 x 300 DPI)

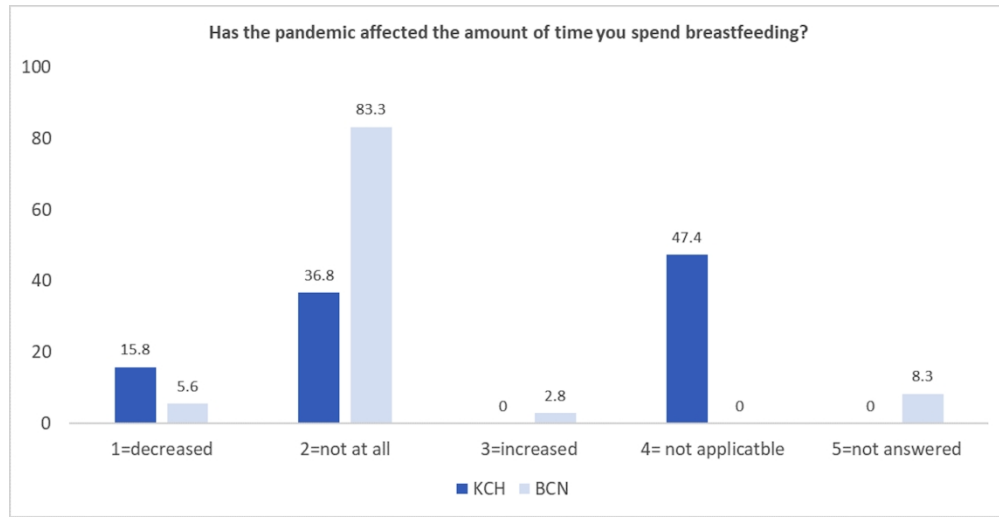

196x100mm (300 x 300 DPI)

1  
2  
3  
4  
5  
6  
7  
8  
9  
10  
11  
12  
13  
14  
15  
16  
17  
18  
19  
20  
21  
22  
23  
24  
25  
26  
27  
28  
29  
30  
31  
32  
33  
34  
35  
36  
37  
38  
39  
40  
41  
42  
43  
44  
45  
46  
47  
48  
49  
50  
51  
52  
53  
54  
55  
56  
57  
58  
59  
60

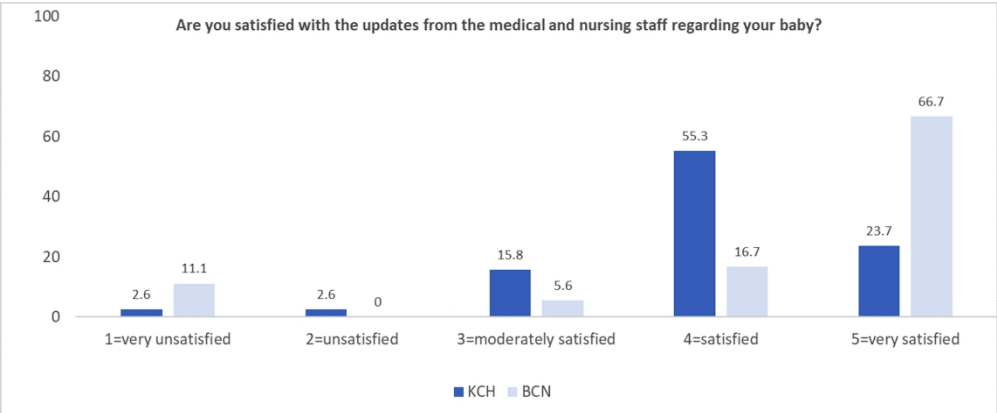

226x93mm (300 x 300 DPI)

1  
2  
3  
4  
5  
6  
7  
8  
9  
10  
11  
12  
13  
14  
15  
16  
17  
18  
19  
20  
21  
22  
23  
24  
25  
26  
27  
28  
29  
30  
31  
32  
33  
34  
35  
36  
37  
38  
39  
40  
41  
42  
43  
44  
45  
46  
47  
48  
49  
50  
51  
52  
53  
54  
55  
56  
57  
58  
59  
60

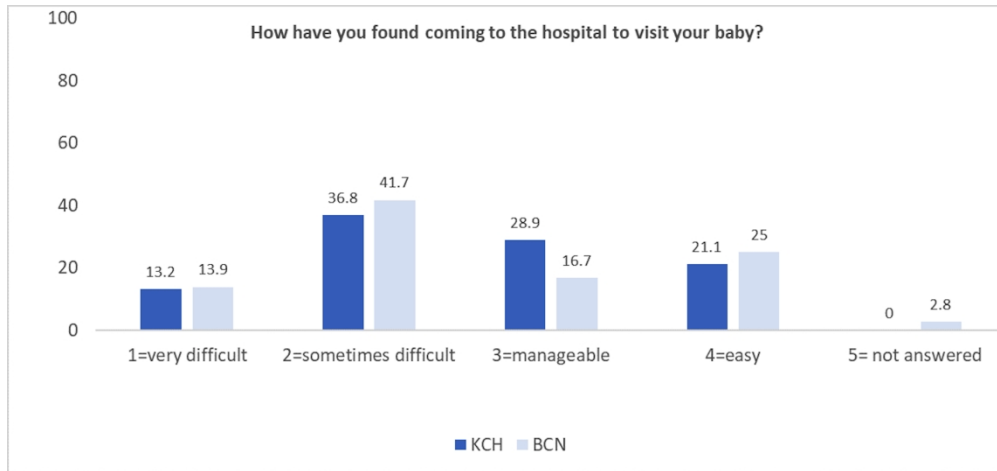

196x92mm (300 x 300 DPI)

# BMJ Paediatrics Open

## Assessing the impact of the Covid-19 pandemic on parental satisfaction in two European neonatal intensive care units

|                               |                                                                                                                                                                                                                                                                                                                                                                                                                                                                                                                                                                                                                                                                                                                                                                                                                                                                                                                                                                                                                                                                                          |
|-------------------------------|------------------------------------------------------------------------------------------------------------------------------------------------------------------------------------------------------------------------------------------------------------------------------------------------------------------------------------------------------------------------------------------------------------------------------------------------------------------------------------------------------------------------------------------------------------------------------------------------------------------------------------------------------------------------------------------------------------------------------------------------------------------------------------------------------------------------------------------------------------------------------------------------------------------------------------------------------------------------------------------------------------------------------------------------------------------------------------------|
| Journal:                      | <i>BMJ Paediatrics Open</i>                                                                                                                                                                                                                                                                                                                                                                                                                                                                                                                                                                                                                                                                                                                                                                                                                                                                                                                                                                                                                                                              |
| Manuscript ID                 | bmjpo-2021-001396.R1                                                                                                                                                                                                                                                                                                                                                                                                                                                                                                                                                                                                                                                                                                                                                                                                                                                                                                                                                                                                                                                                     |
| Article Type:                 | Original research                                                                                                                                                                                                                                                                                                                                                                                                                                                                                                                                                                                                                                                                                                                                                                                                                                                                                                                                                                                                                                                                        |
| Date Submitted by the Author: | 14-Mar-2022                                                                                                                                                                                                                                                                                                                                                                                                                                                                                                                                                                                                                                                                                                                                                                                                                                                                                                                                                                                                                                                                              |
| Complete List of Authors:     | Zorro, Carolina; King's College Hospital NHS Foundation Trust<br>MacRae, Eva; King's College Hospital NHS Foundation Trust<br>Teresa-Palacio, Marta; Barcelona Clinic University Hospital Biomedical Diagnosis Center, Neonatology Department<br>Williams, Emma E.; King's College London, Department of Women and Children's Health<br>Aldecoa-Bilbao, Victoria; Barcelona Biomedical Research Park, Neonatology Department<br>Bhat, Ravindra; King's College Hospital NHS Foundation Trust, Neonatal Intensive Care Unit<br>Hickey, Ann; King's College Hospital NHS Foundation Trust, Neonatal Intensive Care Unit<br>Dassios, Theodore; King's College London, Department of Women and Children's Health, School of Life Sciences, Faculty of Life Science and Medicine; King's College Hospital NHS Foundation Trust, Neonatal Intensive Care Centre<br>Greenough, Anne; King's College London, Department of Women and Children's Health, School of Life Sciences, Faculty of Life Science and Medicine; King's College London, Asthma UK Centre for Allergic Mechanisms in Asthma |
| Keywords:                     | COVID-19, Neonatology                                                                                                                                                                                                                                                                                                                                                                                                                                                                                                                                                                                                                                                                                                                                                                                                                                                                                                                                                                                                                                                                    |
|                               |                                                                                                                                                                                                                                                                                                                                                                                                                                                                                                                                                                                                                                                                                                                                                                                                                                                                                                                                                                                                                                                                                          |

SCHOLARONE™  
Manuscripts

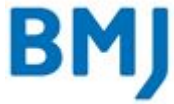

I, the Submitting Author has the right to grant and does grant on behalf of all authors of the Work (as defined in the below author licence), an exclusive licence and/or a non-exclusive licence for contributions from authors who are: i) UK Crown employees; ii) where BMJ has agreed a CC-BY licence shall apply, and/or iii) in accordance with the terms applicable for US Federal Government officers or employees acting as part of their official duties; on a worldwide, perpetual, irrevocable, royalty-free basis to BMJ Publishing Group Ltd ("BMJ") its licensees and where the relevant Journal is co-owned by BMJ to the co-owners of the Journal, to publish the Work in this journal and any other BMJ products and to exploit all rights, as set out in our [licence](#).

The Submitting Author accepts and understands that any supply made under these terms is made by BMJ to the Submitting Author unless you are acting as an employee on behalf of your employer or a postgraduate student of an affiliated institution which is paying any applicable article publishing charge ("APC") for Open Access articles. Where the Submitting Author wishes to make the Work available on an Open Access basis (and intends to pay the relevant APC), the terms of reuse of such Open Access shall be governed by a Creative Commons licence – details of these licences and which [Creative Commons](#) licence will apply to this Work are set out in our licence referred to above.

Other than as permitted in any relevant BMJ Author's Self Archiving Policies, I confirm this Work has not been accepted for publication elsewhere, is not being considered for publication elsewhere and does not duplicate material already published. I confirm all authors consent to publication of this Work and authorise the granting of this licence.



1  
2  
3 **Assessing the impact of the Covid-19 pandemic on parental satisfaction in two**  
4  
5 **European neonatal intensive care units**  
6  
7  
8  
9

10 Carolina Zorro<sup>1</sup>, Eva MacRae<sup>1</sup>, Marta Teresa-Palacio<sup>5</sup>, Emma E. Williams<sup>2</sup>, Victoria Aldecoa-  
11 Bilbao<sup>5</sup>, Ravindra Bhat<sup>1</sup>, Ann Hickey<sup>1</sup>, Theodore Dassios<sup>1,2</sup> and Anne Greenough<sup>2,3,4</sup>  
12  
13  
14  
15  
16  
17

18 <sup>1</sup> Neonatal Intensive Care Centre, King's College Hospital NHS Foundation Trust, London,  
19 United Kingdom  
20  
21

22 <sup>2</sup> Department of Women and Children's Health, School of Life Course Sciences, Faculty of  
23 Life Sciences and Medicine, King's College London, United Kingdom  
24  
25  
26

27 <sup>3</sup> Asthma UK Centre for Allergic Mechanisms in Asthma, King's College London, United  
28 Kingdom  
29  
30  
31

32 <sup>4</sup> NIHR Biomedical Research Centre based at Guy's and St Thomas' NHS Foundation Trust  
33 and King's College London, United Kingdom  
34  
35  
36

37 <sup>5</sup> Neonatology Department, Hospital Clinic Barcelona. BCNatal (Barcelona Center for  
38 Maternal-Foetal and Neonatal Medicine), Barcelona, Spain  
39  
40  
41  
42  
43  
44

45 Corresponding author: Carolina Zorro. Neonatal Intensive Care Centre, 4th Floor Golden  
46 Jubilee Wing, King's College Hospital, Denmark Hill, London, SE5 9RS, United Kingdom.  
47  
48 Tel: +44 0203 299 8744 ; E-mail: [carolina.zorro@nhs.net](mailto:carolina.zorro@nhs.net)  
49  
50  
51  
52  
53  
54

55 **Word count:** 3698  
56

57 **Key words:** Covid-19; parental satisfaction; neonatal care  
58  
59  
60

## ABSTRACT

**Background:** Neonatal units across the world have altered their policies to prevent the spread of infection during the Covid-19 pandemic. Our aim was to report parental experience in two European neonatal units during the pandemic.

**Methods:** Parents of infants admitted to each neonatal unit were asked to complete a questionnaire regarding their experience during the Covid-19 pandemic. At Kings College Hospital, UK (KCH) data were collected prospectively between June 2020 and August 2020 (first wave). At the Hospital Clínic Barcelona (BCN) data were collected retrospectively from parents whose infants were admitted between September 2020 and February 2021 (second and third wave).

**Results:** A total of 74 questionnaires were completed (38 from KCH and 36 from BCN). The parents reported that they were fully involved or involved in the care of their infants in 34 (89.4%) responses in KCH and 33 (91.6%) responses in BCN. Quality time spent with infants during the pandemic was more negatively affected at KCH compared to BCN [n=24 (63.2%) versus n=12 (33.3%]. Parents felt either satisfied or very satisfied with the updates from the clinical care team in 30 (79, 0%) responses at KCH and 30 (83, 4%) responses in BCN. The parents felt that the restrictions negatively affected breastfeeding in 6 (15.8%) responses at KCH and 2 (5.6%) responses in BCN. Travelling to the hospital was reported overall to be sometimes difficult (39.2%); this did not differ-between the two units [14 (36.8%) respondents at KCH and 15 (41.6%) from BCN]. Furthermore, the self-reported amount of time spent giving kangaroo care also did not differ between the two countries.

**Conclusion:** Restrictive policies implemented due to the Covid-19 pandemic had a negative impact on the perception of quality of time spent by parents with their newborns admitted to neonatal units.

## INTRODUCTION

The COVID-19 pandemic forced health care systems worldwide to introduce mitigating measures to reduce the impact of the disease. One of the recommendations was that “numbers of visitors and visiting periods should be highly restricted”. [1] The Royal College of Paediatrics and Child Health (RCPCH) and the British Association of Perinatal Medicine (BAPM) issued guidance to aid policy makers. [2] In response, many neonatal intensive care units amended their unit policies to maintain the safety of infants, parents and clinical staff, whilst continuing to promote family integrated care. The universal responses by most healthcare organisations in imposing restrictions particularly in the early stages, however, often did not consider the unique situation that arises with the mother-baby dyad. Furthermore, restrictions associated with the Covid-19 pandemic in relation to healthcare settings should be taken into account by both health professionals and policy makers as described in a recent global survey. [3] A recent review suggested that the restrictions implemented by neonatal units during the Covid-19 pandemic increased parent and infant separation and subsequently reduced the establishment of successful breast-feeding. [4] Furthermore, a joint UK and US survey of parental perceptions on visiting restrictions during the pandemic highlighted that parents reported reduced involvement and bonding experiences with their infant. [5] Those findings, together with baseline risks already associated with the perinatal and postnatal periods, could worsen long-term parental mental health when the heightened general anxiety around the pandemic is considered. [6] Indeed, parents report visiting restrictions limit their ability to bond and participate in their infant’s care, with concern expressed about receiving insufficient information and medical updates due to restrictions limiting ward round attendance. [5, 7, 8] Furthermore parents described having unmet requirements for emotional and psychological support and facing difficulties with transport, work and medical expenses following discharge. [9]

1  
2  
3 The aim of this observational study was to demonstrate the difference between how two  
4 European neonatal units changed their policies for parents during the pandemic and to  
5 describe parental satisfaction during this time. Specifically, we wanted to explore common  
6 themes experienced by families with infants admitted to intensive care during the pandemic  
7 in two healthcare settings in Europe.  
8  
9  
10  
11  
12  
13  
14  
15  
16

## 17 **METHODS**

18  
19 An observational study was undertaken to describe parental experiences in two European  
20 neonatal intensive care units during the Covid-19 pandemic.  
21  
22  
23  
24  
25  
26

### 27 **London (KCH)**

28  
29 The neonatal unit at King's College Hospital NHS Foundation Trust (London, UK) is a tertiary  
30 medical and surgical neonatal unit with an average of 700 annual admissions. It has a total  
31 bed capacity of 36, including 12 intensive care cots (ITU), 12 high dependency care cots  
32 (HDU), 12 special care (SCBU) cots and an isolation room. In 2020, there were 4,266 births  
33 with 575 infants admitted to the neonatal unit (13.4%), which was the lowest admission rate  
34 in the last 10 years. Of all the admissions 194 (33.7%) required intensive care, 261 (45.4%)  
35 were preterm <37 weeks and 100 (17.4%) weighed less than 1500 grams. Nursing staffing  
36 ratio was 1:1 to 1:2 in ITU, 1:2 in HDU and 1:4 in SCBU per shift and medical staffing ratio  
37 was 1:4 including middle grade doctors and consultants per weekday shift. Parent facilities  
38 on-site include a coffee room and a rest area with one rooming-in room. Pre-pandemic  
39 parental policies allowed both parents, grandparents, siblings and other family members to  
40 visit, with two adults at the cot-side at any one time. Changes to the unit policy at King's  
41 College Hospital during the Covid-19 pandemic were introduced in March 2020 following  
42 recommendations from the Royal College of Paediatrics and Child Health (RCPCH) and  
43 British Association of Perinatal Medicine (BAPM). Only one parent could stay with their baby  
44  
45  
46  
47  
48  
49  
50  
51  
52  
53  
54  
55  
56  
57  
58  
59  
60

1  
2  
3 at a time and no siblings (except twins) or other family members could visit. The parents'  
4 facilities including coffee room, rest area and rooming-in room were closed and parents were  
5 advised not to congregate in the reception area. Further, parents were advised to practice  
6 social distancing and to always wear face masks as per Government guidance. The unit  
7 continued to remain open for restrictive parental attendance 24/7. Parents were only able to  
8 spend time by their own infant's cot-side and advised to bring a separate shirt with them to  
9 the unit for kangaroo care. A maximum of four mothers were allowed in the expressing room.  
10 Parental craft skills and cares such as kangaroo care, nappy changes, skin care, feeding,  
11 bathing the baby and temperature measurements were all still actively encouraged.  
12 Furthermore, breast feeding support continued to be available every day of the week. When  
13 parents had to self-isolate, videocalls were arranged daily so they could see their baby.  
14 During the study period, there were no Covid-positive cases in infants admitted to the unit,  
15 but three parents tested positive for coronavirus and had to self-isolate.  
16  
17  
18  
19  
20  
21  
22  
23  
24  
25  
26  
27  
28  
29  
30  
31  
32  
33

### 34 **Barcelona (BCN)**

35  
36 The neonatal unit at Hospital Clínic Barcelona (Barcelona, Spain) is a tertiary neonatal unit  
37 with an average of 550 annual admissions. It has a total bed capacity of 28 including eight  
38 intensive care cots, eight high dependency care cots and 12 special care cots. In 2020, there  
39 were 3,295 births with 452 infants admitted to the neonatal unit (13.7%). From all the  
40 neonatal admissions, 211 (46.7%) required intensive care, 347 (76.7%) were preterm infants  
41 (<37 weeks) and 83 (23.9%) weighed less than 1500 grams. Nursing staffing ratio was 1:1 to  
42 1:2 in ITU, 1:2 in HDU and 1:4 in SCBU per shift and medical staffing ratio was 1:4 to 1:4.6  
43 including middle grade doctors and consultants per weekday shift. Parent facilities on-site  
44 include a coffee room and rest area and there are 15 live video cameras available in the unit  
45 for families to see their infant when unable to attend the unit. Pre-pandemic parental policies  
46 allowed both parents, grandparents and siblings to enter the unit in groups of two people  
47 each time and the unit remained opened 24/7. From March 2020, following the Spanish  
48  
49  
50  
51  
52  
53  
54  
55  
56  
57  
58  
59  
60

1  
2  
3 Society of Neonatology (*Sociedad Española de Neonatología*) (SENEO) recommendations  
4 to prevent the spread of COVID-19 infection, a restrictive parental policy was implemented.  
5  
6 Only parents could see their baby, one at a time, and they were required to wear a face  
7  
8 mask at all times whilst on the unit. The parent facilities remained opened 24/7 but only one  
9  
10 family could use the parent room at any one time. From June 2020, a less restrictive  
11  
12 parental policy was implemented and both parents could stay with their baby simultaneously,  
13  
14 providing they did not have any coronavirus symptoms and had not been in contact with any  
15  
16 person who had tested positive. There were no Covid-positive cases in babies admitted to  
17  
18 the unit or their parents during the study period.  
19  
20  
21  
22  
23  
24

### 25 **Questionnaire completion**

26  
27  
28 This survey was performed as a service evaluation and improvement project and therefore  
29  
30 ethical approval was not sought. Parents were invited to voluntarily participate and  
31  
32 understood the aim of the survey. All answers were anonymized, and all patient identifiable  
33  
34 information was removed to preserve confidentiality and privacy. The survey was designed  
35  
36 by one of the doctors at KCH. A similar neonatal unit in Spain was identified, with the aim to  
37  
38 have a broader view of the parental experience during the pandemic. Only one questionnaire  
39  
40 was provided per household, so if parents had multiple infants (eg. twins) admitted to the  
41  
42 neonatal unit then they were invited only to participate once. See Figure 1 for infant eligibility  
43  
44 and inclusion per neonatal unit.  
45  
46  
47  
48  
49

50 Parents of infants admitted to Kings College Hospital, UK (KCH) neonatal intensive care unit  
51  
52 were asked to complete a questionnaire prospectively regarding their experience during the  
53  
54 Covid-19 pandemic. The parents were approached by the member of the medical team who  
55  
56 was leading the survey, who discussed the aim of the survey with them and, after giving  
57  
58 verbal consent, they received a written questionnaire and completed this while their baby  
59  
60

1  
2  
3 was still admitted. Questionnaire responses were anonymized after completion and data  
4  
5 collected using a Microsoft Excel spreadsheet.  
6  
7  
8  
9

10 Families of babies admitted to the Hospital Clinic in Barcelona are asked to provide contact  
11 details and an email address at the beginning of the admission and when they provided it,  
12 they consent to be contacted via email. The hospital has a quality and safety management  
13 program (“ISO 9001” and “UNE179003) by which questionnaires are sent via the online  
14 statistical survey application “Lyme Survey” which meets legal requirements of confidentiality  
15 and by completing them, they consent to its final use. Parents of infants admitted to the  
16 Hospital Clinic, Barcelona (BCN) neonatal intensive care unit were asked retrospectively to  
17 complete the same questionnaire used at KCH. One questionnaire was given to each  
18 household and completed anonymously.  
19  
20  
21  
22  
23  
24  
25  
26  
27  
28  
29  
30  
31  
32

33 Parents were eligible to complete the survey if their infant was admitted to the neonatal unit  
34 for at least one week. Parents of infants receiving palliative care were excluded from the  
35 study. The questionnaire contained only six questions aimed at assessing parental  
36 experience during the pandemic, and hence would be rapid and burden free for parents to  
37 complete. The questionnaire considered specific Covid-19 guidance laid out by the RCPCH,  
38 BAPM, SENEIO and the neonatal charity Bliss. Furthermore, parents were also requested to  
39 give free text recommendations as to how the service could be improved during the  
40 pandemic.  
41  
42  
43  
44  
45  
46  
47  
48  
49  
50  
51  
52

53 At KCH data were collected prospectively over a six-week period, between 25<sup>th</sup> June 2020 to  
54 5<sup>th</sup> August 2020 (first wave). At BCN the data were collected retrospectively from parents  
55 whose infants were admitted between 22<sup>nd</sup> September 2020 to 28<sup>th</sup> February 2021 (second  
56 and third wave) and when less restrictive parental policies were in place.  
57  
58  
59  
60

## Patient and Public Involvement

It was not possible to involve patients or the public in the design, or conduct, or reporting, or dissemination plans of our research due to the unpredicted nature of the Covid pandemic and associated restrictions.

## RESULTS

A total of 74 questionnaires were analysed, 38 from KCH and 36 from BCN. Just over half of the parents felt fully involved with the care of their infant (n=43; 58.1%), however this was larger in BCN compared to KCH [n=26 (72.2%) versus n=17 (44.7%)]. Quality time spent with infants during the pandemic was more negatively affected in KCH compared to BCN [n=24 (63.2%) versus n=12 (33.3%)]. For both countries, 44 (59.5%) responders reported the pandemic did not affect the time spent breastfeeding, and 46 (62.2%) reported giving Kangaroo Care was mostly unchanged. Parents from both units were satisfied with clinical updates from medical and nursing staff throughout the pandemic. Travelling back and forth to the hospital to see their infant was reported overall to be sometimes difficult in 29 responses (39.2%), however this was no different in either country (14 from KCH versus 15 at BCN). All infants in both cohorts survived to hospital discharge. See Table 1 for parental responses as per each neonatal unit.

The questionnaire incorporated a section where parents could write comments about their experience in the neonatal unit, including any suggestions they had to improve this. The results of the survey were shared in both units and acknowledged as part of service improvement.



### KCH comments

Many parents expressed concern over the restrictions as they worried it would impact on how often they would be able to see their baby and bond with them, although they appreciated the reasons for this. Parents said it was “difficult with both parents not visiting together”, felt “one parent rule was punishing” and they “could not spend time as a family”. There were mothers who described having less time with their baby so that the fathers could also attend; one said it felt “rushed and stressful having to leave so the father can see the baby”. Some parents described the impact it had on their emotional well-being as well as mental health. For instance, one of them said she had “severe anxiety and was struggling without her partner’s support” and another parent said it was “very difficult to take turns to see our baby when we were under considerable emotional stress”. Difficulties were expressed balancing home life with frequent visits to the hospital, especially with siblings at home, as prior to the pandemic, siblings could be by the cotside or wait with their relatives and use the family facilities with relatives while waiting. One of them said it was “incredibly hard with a twin not allowed in”. Single parents requested being able to nominate a family member to provide additional support. A comment was made that opportunities to express breast milk were affected by limited spaces in the expressing room due to the need for social distancing. One parent also felt that having less time with the baby reduced feeding opportunities. A few parents voiced that although wearing a face mask was understandable, it also made bonding difficult. They expressed feeling “sad” that their baby had never seen them without a mask. Parents worried that not being able to read their facial expressions might have consequences for the baby’s development. A suggestion was made asking if doctors could offer regular conference calls to allow parents to discuss the medical care of their baby together. Parents said they “have been very impressed with the care and felt reassured their baby was in the best hands”, “nurses and doctors are very helpful” and “staff do a good job with getting parents stuck in with cares and bonding”. Overall, parents were

1  
2  
3 very happy and thankful for the clinical care and continuous support provided, despite the  
4  
5 challenges of the pandemic.  
6  
7  
8  
9

### 10 **BCN comments**

11  
12  
13 The quality of time parents spent with their infant was reported by one family to have been  
14  
15 negatively affected by the pandemic, mostly by the wearing of face masks which did not  
16  
17 allow the parents to kiss their baby. Furthermore, quality of time was reported to be reduced  
18  
19 by not being able to have other family members visit their infant. Parents did however report  
20  
21 finding it particularly exciting seeing their infant's name coloured on the wall next to their  
22  
23 incubator and being able to use cameras to see them at any time.  
24  
25  
26  
27  
28  
29

### 30 **DISCUSSION**

31  
32 We demonstrate that parents reported the overall quality of time spent with their infant to be  
33  
34 reduced, especially when more restrictive policies were in place. This may also be related to  
35  
36 the difficulties in travel to the hospital. Concerns were highlighted about parental emotional  
37  
38 wellbeing, feelings of anxiety, bonding as a family and lack of support from partners.  
39  
40  
41  
42  
43

44 We considered why variation in parental satisfaction between the two countries may exist.  
45  
46 Anxiety and apprehension during the first wave was high, with rates of major depressive  
47  
48 symptoms in pregnant women within the UK peaking at 42%,[10] compared to a lower  
49  
50 proportion in Spain reporting such symptoms (38%).[11] In our study parents with infants  
51  
52 admitted to neonatal intensive care were asked to respond to the questionnaire during  
53  
54 different waves of the pandemic. We speculate that the higher levels of self-reported quality  
55  
56 time spent with infants and overall greater parental satisfaction in Barcelona than the UK  
57  
58 may be secondary to previously reported lower baseline rates of depressive symptoms in  
59  
60

1  
2  
3 pregnancy within the Spanish population. More so, parents in the UK were also asked to  
4 complete the questionnaire when visiting was most restrictive. Such differences in self-  
5 reported parental satisfaction within our study agree with a recent UK and US survey which  
6 explored varying policies between units, with a greater negative parental impact identified  
7 during stricter restrictions.[8]  
8  
9  
10  
11  
12  
13  
14  
15  
16

17 Muniraman and colleagues conducted a cross-sectional survey of parents impacted by  
18 restrictive policies in six tertiary neonatal units, from the UK and the USA assessing their  
19 visitation policies and impact on parents' ability to see, care for and bond with their infants. In  
20 a total of 231 responses they reported that the policies were perceived as restrictive by 62%  
21 of the respondents and 41% reporting being unable to bond enough. Mild to severe impact  
22 on breast feeding was reported by 36% (75/209) of respondents. Our study generally agrees  
23 with the above findings and complements the literature by reporting on two separate  
24 populations in two European countries with the Barcelona cohort coming later in time in the  
25 pandemic (up to February 2021 compared to August in 2020 in Muniraman et al.[8])  
26  
27  
28  
29  
30  
31  
32  
33  
34  
35  
36  
37  
38

39 When considering important outcome related factors however, our questionnaire highlights  
40 that many parents within both the UK and Spain do not report a reduction in time spent  
41 breast-feeding or provision of kangaroo care. Over half of our respondents felt kangaroo  
42 care was not affected during the pandemic, which may be reflective of less strict restrictions.  
43 Indeed, this is much higher in comparison to a recent global survey of parental experiences  
44 during the pandemic which found only less than half of respondents reported no change to  
45 the frequency of kangaroo care, however this global survey included some units where  
46 neither parent was allowed to visit during the restrictions.[3] Furthermore, parental  
47 satisfaction in receiving medical updates was not affected regardless of which pandemic  
48 restriction policy was employed.  
49  
50  
51  
52  
53  
54  
55  
56  
57  
58  
59  
60

1  
2  
3 Less restrictive measures were in place during completion of the questionnaire in Barcelona,  
4 when both parents were able to stay with their infant. Having both parents at the cot-side  
5 together may have facilitated kangaroo care, family-integrated care and receiving joint  
6 medical updates to both parents simultaneously.  
7  
8  
9  
10

11  
12  
13  
14 There were many comments made in our study regarding the impact on parental emotional  
15 wellbeing. It is crucial that health professionals remain vigilant in identifying parents who  
16 require additional emotional support and sign posting them to appropriate organisations.  
17  
18  
19  
20

21  
22  
23  
24 The availability of live video cameras within the neonatal unit in Spain for when parents were  
25 unable to see their infant may have been vital in parents feeling more involved with the care  
26 of the infant despite not being physical present. Our survey highlights the importance of  
27 incorporating different modalities into our clinical care such as telephone conferencing and  
28 secure video messaging. Indeed, one study reported that asynchronous video messaging  
29 supported models of family integrated care, improved parental experience and emotional  
30 closeness to their baby and built strong relationships between families and staff.[12]  
31  
32 Furthermore, the use of cot-side cameras has been associated with a reduction in parental  
33 stress when infant separation occurs.[13] Such advancements in technology may thus be  
34 beneficial not only during future pandemics, but also in the provision and delivery of  
35 universal, sustainable and accessible neonatal care.  
36  
37  
38  
39  
40  
41  
42  
43  
44  
45  
46  
47  
48  
49

50  
51 Utilisation of digital innovations as a standard of care when considering service provision  
52 and re-design of units may indeed remove some of the barriers and obstacles often currently  
53 experienced by parents and health care workers in being able to provide and promote family  
54 integrated care, and thus such advances may be a beneficial side-product of the  
55 pandemic.[14-16]  
56  
57  
58  
59  
60

1  
2  
3 Mask wearing is a highly effective measure in reducing virus transmission at a population  
4 level.[17] The use of face masks was a recurring theme expressed by parents from both the  
5 UK and Spain. Wearing of face masks by parents whilst with their infant was identified as a  
6 particular source of anxiety in both countries with concern over the impact upon bonding.  
7  
8 Indeed, there is little knowledge of this with respect to the longer-term consequences on  
9 infant neurodevelopment. Wearing of face masks may affect attachment processes between  
10 parents and their infant within the first few days of life when there is little exposure to and  
11 visualisation of parental facial expressions.[18] Suggested recommendations from the  
12 RCPCH with specific regard to face mask coverings is that consideration for removal should  
13 be given for asymptomatic parents when providing kangaroo care.[19] Furthermore, use of  
14 transparent facemasks or visors, alongside regularly talking through the mask, should be  
15 encouraged to enable bonding and attachment opportunities.[20] Balance of risk must be  
16 made however between the unknown adverse impact of face coverings on infant  
17 neurodevelopment with the global benefits of face masks in reducing virus transmission.  
18  
19  
20  
21  
22  
23  
24  
25  
26  
27  
28  
29  
30  
31  
32  
33  
34  
35

36 The results of this survey were shared amongst both units and actions including updating  
37 unit policies, parents' facilities, psychological support on site and communication with  
38 parents have been taken to improve parental experience and service development. To  
39 improve care in both units and determine the benefits of differing approaches to the  
40 pandemic it would be interesting in future studies to conduct the same survey and data  
41 collection process in the same units over varying time periods during different restrictive  
42 measures of the pandemic.  
43  
44  
45  
46  
47  
48  
49  
50  
51  
52  
53

54 This study has strengths and some limitations. We have surveyed parents from two tertiary  
55 neonatal intensive care units in Europe incorporating two different policies on parental  
56 restrictions during the Covid-19 pandemic. Answers from both cohorts of parents, with  
57  
58  
59  
60

1  
2  
3 different restrictions, may therefore be useful in guiding further policies in future pandemics  
4 to ensure parental satisfaction is taken into consideration. Data were collected from KCH  
5 during the first wave of the pandemic when lock down restrictions were being enforced,  
6 thereby capturing an accurate depiction of parental experience in real time. Contrary to this,  
7 data from BCN were collected retrospectively and when less restrictive policies were in  
8 place, and as such may have positively impacted the reflections of parents who were at  
9 home when completing the form, hence the retrospective nature of the Spanish data  
10 collection acts as a limitation to the study. As responses from Spain were anonymous, it was  
11 not possible to determine how sick the infants were during admission, or how long post  
12 discharge the surveys were completed and how these influences may have further impacted  
13 parental views. Information on whether parents from either country were first time parents  
14 was also not collected. Finally, no control group pre-pandemic was included and we did not  
15 have survey responses to assess baseline perception involvement in care pre-pandemic,  
16 therefore, how self-reported parental satisfaction may have changed within each country  
17 when restrictions and policies were implemented could not be elicited.

18  
19  
20  
21  
22  
23  
24  
25  
26  
27  
28  
29  
30  
31  
32  
33  
34  
35  
36  
37  
38  
39  
40  
41  
42  
43  
44  
45  
46  
47  
48  
49  
50  
51  
52  
53  
54  
55  
56  
57  
58  
59  
60  
The long-term impact of the pandemic upon parents and infants admitted to neonatal care is not known.

In conclusion, restrictive policies implemented due to the Covid-19 pandemic have affected families with infants admitted to neonatal intensive care. Quality of time spent with the babies was felt to be significantly affected, especially when more restrictive policies were implemented. Parental involvement in the care of their babies and satisfaction with the care that infants received and with medical and nursing updates, however, remained positive. The amount of time spent breastfeeding and giving Kangaroo Care decreased during the pandemic, but was not significantly different between the two units. Neonatal units need to find strategies to mitigate the impact of separation on parental experience and bonding if a similar situation occurs in the future.

## ACKNOWLEDGEMENTS

**Funding statement:** This research was supported by the National Institute for Health Research (NIHR) Biomedical Research Centre at Guy's and St Thomas' NHS Foundation Trust and King's College London. The views expressed are those of the authors and not necessarily those of the NHS, the NIHR or the Department of Health.

**Competing interest statement:** The authors have no conflict of interest to declare

### Authors contribution:

Carolina Zorro designed the study, participated in the analysis of data and the writing of the manuscript

Eva MacRae participated in the design of the study, data acquisition, participated in the analysis and critically revised the manuscript

Marta Teresa-Palacio acquired the data from BCN, participated in the analysis and critically reviewed the manuscript

Emma E. Williams participated in the analysis of data and the writing of the manuscript

Victoria Aldecoa-Bilbao acquired the data from BCN, participated in the analysis and critically reviewed the manuscript

Ravindra Bhat participated in the design of the study and critically reviewed the manuscript

Ann Hickey participated in the design of the study and critically reviewed the manuscript

Theodore Dassios participated in the analysis of data and the writing of the manuscript

Anne Greenough supervised the project, participated in the design and analysis of the study and critically revised the manuscript

**Data sharing statement:** Data will be shared on reasonable request

**Patient consent:** All parents consented to take part in the survey

**What is known about the subject**

- The COVID-19 pandemic has led to restrictive policies across neonatal units.
- Parental policies varied between centers and over time, being stricter at the beginning of the pandemic.

**What this study adds**

- Despite the restrictive policies implemented satisfaction with the care that infants received and with medical updates remained positive.
- Overall time spent in breastfeeding and in Kangaroo Care was affected by the pandemic but there were no differences between different policies.
- The use of facemasks generated parental anxiety and difficulties in bonding with their babies.



## REFERENCES

1. Organisation WH. Maintaining essential health services: operational guidance for the COVID-19 context interim guidance. 2020. p. 61.
2. Neonatologia SEd. Recommendations for management of newborns for SARS-CoV-2 infection. In: Neonatology SSo, editor. 2020. p. 16.
3. Kostenzer J, Hoffmann J, von Rosenstiel-Pulver C, et al. Neonatal care during the COVID-19 pandemic - a global survey of parents' experiences regarding infant and family-centred developmental care. *EClinicalMedicine* 2021;**39**:101056.
4. van Veenendaal NR, Deierl A, Bacchini F, et al. International Steering Committee for Family Integrated C. Supporting parents as essential care partners in neonatal units during the SARS-CoV-2 pandemic. *Acta Paediatr* 2021;**110**:2008-22.
5. Brown A, Shenker N. Experiences of breastfeeding during COVID-19: Lessons for future practical and emotional support. *Matern Child Nutr* 2021;**17**:e1388.
6. Ashini A, Alsoufi A, Elhadi M. Parental perception of neonatal ICU visitation during the COVID-19 pandemic. *Int J Gynaecol Obstet* 2021;**153**:554-5.
7. Darcy Mahoney A, White RD, Velasquez A, et al. Impact of restrictions on parental presence in neonatal intensive care units related to coronavirus disease 2019. *J Perinatol* 2020;**40**:36-46.
8. Muniraman H, Ali M, Cawley P, et al. Parental perceptions of the impact of neonatal unit visitation policies during COVID-19 pandemic. *BMJ Paediatr Open* 2020;**4**:e000899.
9. Fan J, Zhou M, Wei L, et al. A qualitative study on the psychological needs of hospitalized newborns' parents during COVID-19 outbreak in China. *Iran J Pediatr* 2020;**30**:e102748.

- 1  
2  
3 10. Ceulemans M, Foulon V, Ngo E, et al. Mental health status of pregnant and  
4 breastfeeding women during the COVID-19 pandemic-A multinational cross-sectional study.  
5 *Acta Obstet Gynecol Scand* 2021;**100**:1219-29.  
6  
7  
8  
9  
10 11. Brik M, Sandonis MA, Fernandez S, et al. Psychological impact and social support in  
11 pregnant women during lockdown due to SARS-CoV2 pandemic: A cohort study. *Acta*  
12 *Obstet Gynecol Scand* 2021;**100**:1026-33.  
13  
14  
15  
16  
17 12. Kirolos S, Sutcliffe L, Giatsi Clausen M, et al. Asynchronous video messaging  
18 promotes family involvement and mitigates separation in neonatal care. *Arch Dis Child Fetal*  
19 *Neonatal Ed* 2021;**106**:172-7.  
20  
21  
22  
23  
24  
25 13. Guttman K, Patterson C, Haines T, et al. Parent stress in relation to use of bedside  
26 telehealth, an initiative to improve family-centeredness of care in the neonatal intensive care  
27 unit. *J Patient Exp* 2020;**7**:1378-83.  
28  
29  
30  
31  
32 14. MacSween K, Fraser C, Clinton T, et al. Neonatal healthcare workers' perceptions of  
33 the impact of the COVID-19 pandemic. *Acta Paediatr* 2021;**110**:2814-6.  
34  
35  
36  
37 15. Waddington C, van Veenendaal NR, O'Brien K, et al. International Steering  
38 Committee for Family Integrated C. Family integrated care: Supporting parents as primary  
39 caregivers in the neonatal intensive care unit. *Pediatr Investig* 2021;**5**:148-54.  
40  
41  
42  
43  
44 16. Campbell-Yeo M, Dol J, Richardson B, et al. A co-design of clinical virtual care  
45 pathways to engage and support families requiring neonatal intensive care in response to  
46 the COVID-19 pandemic (COVES study). *J Neonatal Nurs* 2021 [Epub ahead of print].  
47  
48  
49  
50  
51  
52 17. Howard J, Huang A, Li Z, et al. An evidence review of face masks against COVID-19.  
53 *Proc Natl Acad Sci USA* 2021;**118**: e2014564118.  
54  
55  
56  
57 18. Green J, Staff L, Bromley P, et al. The implications of face masks for babies and  
58 families during the COVID-19 pandemic: A discussion paper. *J Neonatal Nurs* 2021;**27**:21-5.  
59  
60

1  
2  
3 19. Health RCoPaC. BAPM - COVID-19: Frequently asked questions within neonatal  
4 services. In: RCPCH, editor. 2021.  
5  
6

7  
8 20. Verd S, Moll P, Serra C, et al. Mothers' masks should be improved or removed  
9 during pandemic as they inhibit bonding with neonates. *Acta Paediatr* 2021;**110**(5):1689.  
10  
11  
12  
13  
14  
15  
16  
17  
18  
19  
20  
21  
22  
23  
24  
25  
26  
27  
28  
29  
30  
31  
32  
33  
34  
35  
36  
37  
38  
39  
40  
41  
42  
43  
44  
45  
46  
47  
48  
49  
50  
51  
52  
53  
54  
55  
56  
57  
58  
59  
60

Confidential: For Review Only

**Table 1: Parental responses as per each neonatal unit. Data are expressed as number with****percent (%)****in brackets**

|                                                                                                 | KCH [n=38 (%)] | BCN [n=36 (%)] |
|-------------------------------------------------------------------------------------------------|----------------|----------------|
| <b>How involved do you feel with the care of your baby?</b>                                     |                |                |
| <i>1=not at all</i>                                                                             | 0 (0.0)        | 0 (0.0)        |
| <i>2 = a little involved</i>                                                                    | 4 (10.5)       | 3 (8.3)        |
| <i>3 = quite involved</i>                                                                       | 17 (44.7)      | 7 (19.4)       |
| <i>4 = fully involved</i>                                                                       | 17 (44.7)      | 26 (72.2)      |
| <b>Do you feel that the pandemic has affected the quality of time you spend with your baby?</b> |                |                |
| <i>1=disimproved</i>                                                                            | 24 (63.2)      | 12 (33.3)      |
| <i>2=not at all</i>                                                                             | 13 (34.2)      | 19 (52.8)      |
| <i>3=improved</i>                                                                               | 1 (2.6)        | 4 (11.1)       |
| <i>4=not answered</i>                                                                           | 0 (0.0)        | 1 (2.8)        |
| <b>Has the pandemic affected the amount of time you spend giving kangaroo care?</b>             |                |                |
| <i>1=decreased</i>                                                                              | 13 (34.2)      | 6 (16.7)       |
| <i>2=not at all</i>                                                                             | 21 (55.3)      | 25 (69.4)      |
| <i>3=increased</i>                                                                              | 0 (0.0)        | 2 (5.6)        |
| <i>4=not applicable</i>                                                                         | 4 (10.5)       | 0 (0.0)        |
| <i>5 = not answered</i>                                                                         | 0 (0.0)        | 3 (8.3)        |
| <b>Has the pandemic affected the amount of time you spend breastfeeding?</b>                    |                |                |
| <i>1=decreased</i>                                                                              | 6 (15.8)       | 2 (5.6)        |
| <i>2=not at all</i>                                                                             | 14 (36.8)      | 30 (83.3)      |
| <i>3=increased</i>                                                                              | 0 (0.0)        | 1 (2.8)        |
| <i>4= not applicable</i>                                                                        | 18 (47.4)      | 0 (0.0)        |
| <i>5=not answered</i>                                                                           | 0 (0.0)        | 3 (8.3)        |

| <b>Are you satisfied with the updates from the medical and nursing staff regarding your baby?</b> |           |           |
|---------------------------------------------------------------------------------------------------|-----------|-----------|
| <i>1=very unsatisfied</i>                                                                         | 1 (2.6)   | 4 (11.1)  |
| <i>2=unsatisfied</i>                                                                              | 1 (2.6)   | 0 (0.0)   |
| <i>3=moderately satisfied</i>                                                                     | 6 (15.8)  | 2 (5.6)   |
| <i>4=satisfied</i>                                                                                | 21 (55.3) | 6 (16.7)  |
| <i>5=very satisfied</i>                                                                           | 9 (23.7)  | 24 (66.7) |
| <b>How have you found coming to the hospital to visit your baby?</b>                              |           |           |
| <i>1=very difficult</i>                                                                           | 5 (13.2)  | 5 (13.9)  |
| <i>2=sometimes difficult</i>                                                                      | 14 (36.8) | 15 (41.7) |
| <i>3=manageable</i>                                                                               | 11 (28.9) | 6 (16.7)  |
| <i>4=easy</i>                                                                                     | 8 (21.1)  | 9 (25.0)  |
| <i>5= not answered</i>                                                                            | 0 (0.0)   | 1 (2.8)   |

1  
2  
3  
4  
5  
6  
7  
8  
9  
10  
11  
12  
13  
14  
15  
16  
17  
18  
19  
20  
21  
22  
23  
24  
25  
26  
27  
28  
29  
30  
31  
32  
33  
34  
35  
36  
37  
38  
39  
40  
41  
42  
43  
44  
45  
46  
47  
48  
49  
50  
51  
52  
53  
54  
55  
56  
57  
58  
59  
60

**FIGURE LEGENDS**

**Figure 1:** Consort diagram to portray participant inclusion per neonatal unit.

Confidential: For Review Only

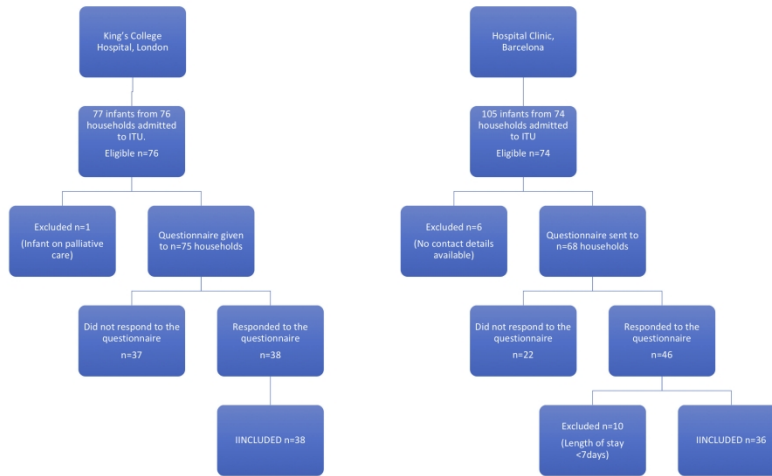

## Parental satisfaction questionnaire during COVID-19 pandemic

Hospital No:

This questionnaire is aimed at assessing whether you feel the coronavirus pandemic has affected your experience on NICU and bonding with your baby

1. How involved do you feel with the care of your baby (e.g. feeding, bathing, skin care, taking the temperature, changing the nappy)?
  - a. Not at all
  - b. A little involved
  - c. Quite Involved
  - d. Fully involved
  
2. Do you feel that the pandemic has affected the quality of time you spend with your baby?
  - a. Not at all
  - b. Improved quality of time
  - c. Disimproved quality of time
  
- 3a. Has the pandemic affected the amount of time you spend giving kangaroo care?
  - a. No at all
  - b. Increased
  - c. Decreased
  - d. Not applicable (please give a reason) \_\_\_\_\_
  
- 3b. How has the pandemic has affected the amount of time you spend breastfeeding your baby? (please specify if you have decided not to breastfeed)
  - a. Not at all
  - b. Increased
  - c. Decreased
  - d. Not applicable (please give a reason) \_\_\_\_\_
  
- 4 Are you satisfied with the updates from the medical and nursing staff regarding your baby?
  - a. Very unsatisfied
  - b. Unsatisfied
  - c. Moderately satisfied
  - d. Satisfied
  - e. Very satisfied



## Parental satisfaction questionnaire during COVID-19 pandemic

- 1  
2  
3  
4  
5  
6  
7  
8  
9
- 5 How have you found coming to the hospital to visit your baby?
- a. Very difficult
  - b. Sometimes Difficult
  - c. Manageable
  - d. Easy

- 10  
11  
12  
13  
14  
15  
16  
17  
18  
19  
20  
21  
22  
23  
24  
25  
26  
27  
28  
29  
30  
31  
32  
33  
34  
35  
36  
37  
38  
39  
40  
41  
42  
43  
44  
45  
46  
47  
48  
49  
50  
51  
52  
53  
54  
55  
56  
57  
58  
59  
60
- 6 If you would like to add any comments or suggestions on any of the above, please complete the box below



# BMJ Paediatrics Open

## Assessing the impact of the Covid-19 pandemic on parental satisfaction in two European neonatal intensive care units

|                               |                                                                                                                                                                                                                                                                                                                                                                                                                                                                                                                                                                                                                                                                                                                                                                                                                                                                                                                                                                                                                                                                                          |
|-------------------------------|------------------------------------------------------------------------------------------------------------------------------------------------------------------------------------------------------------------------------------------------------------------------------------------------------------------------------------------------------------------------------------------------------------------------------------------------------------------------------------------------------------------------------------------------------------------------------------------------------------------------------------------------------------------------------------------------------------------------------------------------------------------------------------------------------------------------------------------------------------------------------------------------------------------------------------------------------------------------------------------------------------------------------------------------------------------------------------------|
| Journal:                      | <i>BMJ Paediatrics Open</i>                                                                                                                                                                                                                                                                                                                                                                                                                                                                                                                                                                                                                                                                                                                                                                                                                                                                                                                                                                                                                                                              |
| Manuscript ID                 | bmjpo-2021-001396.R2                                                                                                                                                                                                                                                                                                                                                                                                                                                                                                                                                                                                                                                                                                                                                                                                                                                                                                                                                                                                                                                                     |
| Article Type:                 | Original research                                                                                                                                                                                                                                                                                                                                                                                                                                                                                                                                                                                                                                                                                                                                                                                                                                                                                                                                                                                                                                                                        |
| Date Submitted by the Author: | 05-May-2022                                                                                                                                                                                                                                                                                                                                                                                                                                                                                                                                                                                                                                                                                                                                                                                                                                                                                                                                                                                                                                                                              |
| Complete List of Authors:     | Zorro, Carolina; King's College Hospital NHS Foundation Trust<br>MacRae, Eva; King's College Hospital NHS Foundation Trust<br>Teresa-Palacio, Marta; Barcelona Clinic University Hospital Biomedical Diagnosis Center, Neonatology Department<br>Williams, Emma E.; King's College London, Department of Women and Children's Health<br>Aldecoa-Bilbao, Victoria; Barcelona Biomedical Research Park, Neonatology Department<br>Bhat, Ravindra; King's College Hospital NHS Foundation Trust, Neonatal Intensive Care Unit<br>Hickey, Ann; King's College Hospital NHS Foundation Trust, Neonatal Intensive Care Unit<br>Dassios, Theodore; King's College London, Department of Women and Children's Health, School of Life Sciences, Faculty of Life Science and Medicine; King's College Hospital NHS Foundation Trust, Neonatal Intensive Care Centre<br>Greenough, Anne; King's College London, Department of Women and Children's Health, School of Life Sciences, Faculty of Life Science and Medicine; King's College London, Asthma UK Centre for Allergic Mechanisms in Asthma |
| Keywords:                     | COVID-19, Neonatology                                                                                                                                                                                                                                                                                                                                                                                                                                                                                                                                                                                                                                                                                                                                                                                                                                                                                                                                                                                                                                                                    |
|                               |                                                                                                                                                                                                                                                                                                                                                                                                                                                                                                                                                                                                                                                                                                                                                                                                                                                                                                                                                                                                                                                                                          |

SCHOLARONE™  
Manuscripts



I, the Submitting Author has the right to grant and does grant on behalf of all authors of the Work (as defined in the below author licence), an exclusive licence and/or a non-exclusive licence for contributions from authors who are: i) UK Crown employees; ii) where BMJ has agreed a CC-BY licence shall apply, and/or iii) in accordance with the terms applicable for US Federal Government officers or employees acting as part of their official duties; on a worldwide, perpetual, irrevocable, royalty-free basis to BMJ Publishing Group Ltd ("BMJ") its licensees and where the relevant Journal is co-owned by BMJ to the co-owners of the Journal, to publish the Work in this journal and any other BMJ products and to exploit all rights, as set out in our [licence](#).

The Submitting Author accepts and understands that any supply made under these terms is made by BMJ to the Submitting Author unless you are acting as an employee on behalf of your employer or a postgraduate student of an affiliated institution which is paying any applicable article publishing charge ("APC") for Open Access articles. Where the Submitting Author wishes to make the Work available on an Open Access basis (and intends to pay the relevant APC), the terms of reuse of such Open Access shall be governed by a Creative Commons licence – details of these licences and which [Creative Commons](#) licence will apply to this Work are set out in our licence referred to above.

Other than as permitted in any relevant BMJ Author's Self Archiving Policies, I confirm this Work has not been accepted for publication elsewhere, is not being considered for publication elsewhere and does not duplicate material already published. I confirm all authors consent to publication of this Work and authorise the granting of this licence.

1  
2  
3 **Assessing the impact of the Covid-19 pandemic on parental satisfaction in two**  
4  
5 **European neonatal intensive care units**  
6  
7  
8  
9

10 Carolina Zorro<sup>1</sup>, Eva MacRae<sup>1</sup>, Marta Teresa-Palacio<sup>5</sup>, Emma E. Williams<sup>2</sup>, Victoria Aldecoa-  
11 Bilbao<sup>5</sup>, Ravindra Bhat<sup>1</sup>, Ann Hickey<sup>1</sup>, Theodore Dassios<sup>1,2</sup> and Anne Greenough<sup>2,3,4</sup>  
12  
13  
14  
15  
16  
17

18 <sup>1</sup> Neonatal Intensive Care Centre, King's College Hospital NHS Foundation Trust, London,  
19 United Kingdom  
20  
21

22 <sup>2</sup> Department of Women and Children's Health, School of Life Course Sciences, Faculty of  
23 Life Sciences and Medicine, King's College London, United Kingdom  
24  
25  
26

27 <sup>3</sup> Asthma UK Centre for Allergic Mechanisms in Asthma, King's College London, United  
28 Kingdom  
29  
30  
31

32 <sup>4</sup> NIHR Biomedical Research Centre based at Guy's and St Thomas' NHS Foundation Trust  
33 and King's College London, United Kingdom  
34  
35  
36

37 <sup>5</sup> Neonatology Department, Hospital Clinic Barcelona. BCNatal (Barcelona Center for  
38 Maternal-Foetal and Neonatal Medicine), Barcelona, Spain  
39  
40  
41  
42  
43  
44

45 Corresponding author: Carolina Zorro. Neonatal Intensive Care Centre, 4th Floor Golden  
46 Jubilee Wing, King's College Hospital, Denmark Hill, London, SE5 9RS, United Kingdom.  
47  
48 Tel: +44 0203 299 8744 ; E-mail: [carolina.zorro@nhs.net](mailto:carolina.zorro@nhs.net)  
49  
50  
51  
52  
53  
54

55 **Word count:** 3752  
56

57 **Key words:** Covid-19; parental satisfaction; neonatal care  
58  
59  
60

## ABSTRACT

**Background:** Neonatal units across the world have altered their policies to prevent the spread of infection during the Covid-19 pandemic. Our aim was to report parental experience in two European neonatal units during the pandemic.

**Methods:** Parents of infants admitted to each neonatal unit were asked to complete a questionnaire regarding their experience during the Covid-19 pandemic. At Kings College Hospital, UK (KCH) data were collected prospectively between June 2020 and August 2020 (first wave). At the Hospital Clínic Barcelona (BCN) data were collected retrospectively from parents whose infants were admitted between September 2020 and February 2021 (second and third wave).

**Results:** A total of 74 questionnaires were completed (38 from KCH and 36 from BCN). The parents reported that they were fully involved or involved in the care of their infants in 34 (89.4%) responses in KCH and 33 (91.6%) responses in BCN. Quality time spent with infants during the pandemic was more negatively affected at KCH compared to BCN [n=24 (63.2%) versus n=12 (33.3%]. Parents felt either satisfied or very satisfied with the updates from the clinical care team in 30 (79, 0%) responses at KCH and 30 (83, 4%) responses in BCN. The parents felt that the restrictions negatively affected breastfeeding in 6 (15.8%) responses at KCH and 2 (5.6%) responses in BCN. Travelling to the hospital was reported overall to be sometimes difficult (39.2%); this did not differ-between the two units [14 (36.8%) respondents at KCH and 15 (41.6%) from BCN]. Furthermore, the self-reported amount of time spent giving kangaroo care also did not differ between the two countries.

**Conclusion:** Restrictive policies implemented due to the Covid-19 pandemic had a negative impact on the perception of quality of time spent by parents with their newborns admitted to neonatal units.

## INTRODUCTION

The COVID-19 pandemic forced health care systems worldwide to introduce mitigating measures to reduce the impact of the disease. One of the recommendations was that “numbers of visitors and visiting periods should be highly restricted”. [1] The Royal College of Paediatrics and Child Health (RCPCH) and the British Association of Perinatal Medicine (BAPM) issued guidance to aid policy makers. [2] In response, many neonatal intensive care units amended their unit policies to maintain the safety of infants, parents and clinical staff, whilst continuing to promote family integrated care. The universal responses by most healthcare organisations in imposing restrictions particularly in the early stages, however, often did not consider the unique situation that arises with the mother-baby dyad. Furthermore, restrictions associated with the Covid-19 pandemic in relation to healthcare settings should be taken into account by both health professionals and policy makers as described in a recent global survey. [3] A recent review suggested that the restrictions implemented by neonatal units during the Covid-19 pandemic increased parent and infant separation and subsequently reduced the establishment of successful breast-feeding. [4] Furthermore, a joint UK and US survey of parental perceptions on visiting restrictions during the pandemic highlighted that parents reported reduced involvement and bonding experiences with their infant. [5] Those findings, together with baseline risks already associated with the perinatal and postnatal periods, could worsen long-term parental mental health when the heightened general anxiety around the pandemic is considered. [6] Indeed, parents report visiting restrictions limit their ability to bond and participate in their infant’s care, with concern expressed about receiving insufficient information and medical updates due to restrictions limiting ward round attendance. [5, 7, 8] Furthermore parents described having unmet requirements for emotional and psychological support and facing difficulties with transport, work and medical expenses following discharge. [9]

1  
2  
3 The aim of this observational study was to demonstrate the difference between how two  
4 European neonatal units changed their policies for parents during the pandemic and to  
5 describe parental satisfaction during this time. Specifically, we wanted to explore common  
6 themes experienced by families with infants admitted to intensive care during the pandemic  
7 in two healthcare settings in Europe.  
8  
9  
10  
11  
12  
13  
14  
15  
16

## 17 **METHODS**

18  
19  
20 An observational study was undertaken to describe parental experiences in two European  
21 neonatal intensive care units during the Covid-19 pandemic. The study was registered as a  
22 service evaluation with the Clinical Governance Department of King's College Hospital NHS  
23 Foundation Trust, London, UK. The Health Research Authority Toolkit of the Medical  
24 Research Council, UK confirmed that the study would not be considered as research and  
25 would not require regulatory approval by a research ethics committee.  
26  
27  
28  
29  
30  
31  
32  
33  
34

### 35 **London (KCH)**

36  
37  
38 The neonatal unit at King's College Hospital NHS Foundation Trust (London, UK) is a tertiary  
39 medical and surgical neonatal unit with an average of 700 annual admissions. It has a total  
40 bed capacity of 36, including 12 intensive care cots (ITU), 12 high dependency care cots  
41 (HDU), 12 special care (SCBU) cots and an isolation room. In 2020, there were 4,266 births  
42 with 575 infants admitted to the neonatal unit (13.4%), which was the lowest admission rate  
43 in the last 10 years. Of all the admissions 194 (33.7%) required intensive care, 261 (45.4%)  
44 were preterm <37 weeks and 100 (17.4%) weighed less than 1500 grams. Nursing staffing  
45 ratio was 1:1 to 1:2 in ITU, 1:2 in HDU and 1:4 in SCBU per shift and medical staffing ratio  
46 was 1:4 including middle grade doctors and consultants per weekday shift. Parent facilities  
47 on-site include a coffee room and a rest area with one rooming-in room. Pre-pandemic  
48 parental policies allowed both parents, grandparents, siblings and other family members to  
49  
50  
51  
52  
53  
54  
55  
56  
57  
58  
59  
60

1  
2  
3 visit, with two adults at the cot-side at any one time. Changes to the unit policy at King's  
4  
5 College Hospital during the Covid-19 pandemic were introduced in March 2020 following  
6  
7 recommendations from the Royal College of Paediatrics and Child Health (RCPCH) and  
8  
9 British Association of Perinatal Medicine (BAPM). Only one parent could stay with their baby  
10  
11 at a time and no siblings (except twins) or other family members could visit. The parents'  
12  
13 facilities including coffee room, rest area and rooming-in room were closed and parents were  
14  
15 advised not to congregate in the reception area. Further, parents were advised to practice  
16  
17 social distancing and to always wear face masks as per Government guidance. The unit  
18  
19 continued to remain open for restrictive parental attendance 24/7. Parents were only able to  
20  
21 spend time by their own infant's cot-side and advised to bring a separate shirt with them to  
22  
23 the unit for kangaroo care. A maximum of four mothers were allowed in the expressing room.  
24  
25 Parental craft skills and cares such as kangaroo care, nappy changes, skin care, feeding,  
26  
27 bathing the baby and temperature measurements were all still actively encouraged.  
28  
29 Furthermore, breast feeding support continued to be available every day of the week. When  
30  
31 parents had to self-isolate, videocalls were arranged daily so they could see their baby.  
32  
33 During the study period, there were no Covid-positive cases in infants admitted to the unit,  
34  
35 but three parents tested positive for coronavirus and had to self-isolate.  
36  
37  
38  
39  
40  
41

## 42 **Barcelona (BCN)**

43  
44  
45 The neonatal unit at Hospital Clínic Barcelona (Barcelona, Spain) is a tertiary neonatal unit  
46  
47 with an average of 550 annual admissions. It has a total bed capacity of 28 including eight  
48  
49 intensive care cots, eight high dependency care cots and 12 special care cots. In 2020, there  
50  
51 were 3,295 births with 452 infants admitted to the neonatal unit (13.7%). From all the  
52  
53 neonatal admissions, 211 (46.7%) required intensive care, 347 (76.7%) were preterm infants  
54  
55 (<37 weeks) and 83 (23.9%) weighed less than 1500 grams. Nursing staffing ratio was 1:1 to  
56  
57 1:2 in ITU, 1:2 in HDU and 1:4 in SCBU per shift and medical staffing ratio was 1:4 to 1:4.6  
58  
59 including middle grade doctors and consultants per weekday shift. Parent facilities on-site  
60



1  
2  
3 include a coffee room and rest area and there are 15 live video cameras available in the unit  
4  
5 for families to see their infant when unable to attend the unit. Pre-pandemic parental policies  
6  
7 allowed both parents, grandparents and siblings to enter the unit in groups of two people  
8  
9 each time and the unit remained opened 24/7. From March 2020, following the Spanish  
10  
11 Society of Neonatology (*Sociedad Española de Neonatología*) (SENEO) recommendations  
12  
13 to prevent the spread of COVID-19 infection, a restrictive parental policy was implemented.  
14  
15 Only parents could see their baby, one at a time, and they were required to wear a face  
16  
17 mask at all times whilst on the unit. The parent facilities remained opened 24/7 but only one  
18  
19 family could use the parent room at any one time. From June 2020, a less restrictive  
20  
21 parental policy was implemented and both parents could stay with their baby simultaneously,  
22  
23 providing they did not have any coronavirus symptoms and had not been in contact with any  
24  
25 person who had tested positive. There were no Covid-positive cases in babies admitted to  
26  
27 the unit or their parents during the study period.  
28  
29  
30  
31  
32  
33

### 34 **Questionnaire completion**

35  
36 This survey was performed as a service evaluation and improvement project and therefore  
37  
38 ethical approval was not sought. Parents were invited to voluntarily participate and  
39  
40 understood the aim of the survey. All answers were anonymized, and all patient identifiable  
41  
42 information was removed to preserve confidentiality and privacy. The survey was designed  
43  
44 by one of the doctors at KCH. A similar neonatal unit in Spain was identified, with the aim to  
45  
46 have a broader view of the parental experience during the pandemic. Only one questionnaire  
47  
48 was provided per household, so if parents had multiple infants (eg. twins) admitted to the  
49  
50 neonatal unit then they were invited only to participate once. See Figure 1 for infant eligibility  
51  
52 and inclusion per neonatal unit.  
53  
54  
55  
56  
57  
58  
59  
60

1  
2  
3 Parents of infants admitted to Kings College Hospital, UK (KCH) neonatal intensive care unit  
4 were asked to complete a questionnaire prospectively regarding their experience during the  
5 Covid-19 pandemic. The parents were approached by the member of the medical team who  
6 was leading the survey, who discussed the aim of the survey with them and, after giving  
7 verbal consent, they received a written questionnaire and completed this while their baby  
8 was still admitted. Questionnaire responses were anonymized after completion and data  
9 collected using a Microsoft Excel spreadsheet.  
10  
11  
12  
13  
14  
15  
16  
17  
18  
19  
20

21 Families of babies admitted to the Hospital Clinic in Barcelona are asked to provide contact  
22 details and an email address at the beginning of the admission and when they provided it,  
23 they consent to be contacted via email. The hospital has a quality and safety management  
24 program ("ISO 9001" and "UNE179003) by which questionnaires are sent via the online  
25 statistical survey application "Lyme Survey" which meets legal requirements of confidentiality  
26 and by completing them, they consent to its final use. Parents of infants admitted to the  
27 Hospital Clinic, Barcelona (BCN) neonatal intensive care unit were asked retrospectively to  
28 complete the same questionnaire used at KCH. One questionnaire was given to each  
29 household and completed anonymously.  
30  
31  
32  
33  
34  
35  
36  
37  
38  
39  
40  
41  
42  
43

44 Parents were eligible to complete the survey if their infant was admitted to the neonatal unit  
45 for at least one week. Parents of infants receiving palliative care were excluded from the  
46 study. The questionnaire contained only six questions aimed at assessing parental  
47 experience during the pandemic, and hence would be rapid and burden free for parents to  
48 complete. The questionnaire considered specific Covid-19 guidance laid out by the RCPCH,  
49 BAPM, SENEIO and the neonatal charity Bliss. Furthermore, parents were also requested to  
50 give free text recommendations as to how the service could be improved during the  
51 pandemic.  
52  
53  
54  
55  
56  
57  
58  
59  
60

1  
2  
3  
4  
5  
6 At KCH data were collected prospectively over a six-week period, between 25<sup>th</sup> June 2020 to  
7  
8 5<sup>th</sup> August 2020 (first wave). At BCN the data were collected retrospectively from parents  
9  
10 whose infants were admitted between 22<sup>nd</sup> September 2020 to 28<sup>th</sup> February 2021 (second  
11  
12 and third wave) and when less restrictive parental policies were in place.  
13  
14

### 15 **Patient and Public Involvement**

16  
17  
18 It was not possible to involve patients or the public in the design, or conduct, or reporting, or  
19  
20 dissemination plans of our research due to the unpredicted nature of the Covid pandemic  
21  
22 and associated restrictions.  
23  
24  
25

### 26 **RESULTS**

27  
28  
29 A total of 74 questionnaires were analysed, 38 from KCH and 36 from BCN. Just over half of  
30  
31 the parents felt fully involved with the care of their infant (n=43; 58.1%), however this was  
32  
33 larger in BCN compared to KCH [n=26 (72.2%) versus n=17 (44.7%)]. Quality time spent  
34  
35 with infants during the pandemic was more negatively affected in KCH compared to BCN  
36  
37 [n=24 (63.2%) versus n=12 (33.3%)]. For both countries, 44 (59.5%) responders reported  
38  
39 the pandemic did not affect the time spent breastfeeding, and 46 (62.2%) reported giving  
40  
41 Kangaroo Care was mostly unchanged. Parents from both units were satisfied with clinical  
42  
43 updates from medical and nursing staff throughout the pandemic. Travelling back and forth  
44  
45 to the hospital to see their infant was reported overall to be sometimes difficult in 29  
46  
47 responses (39.2%), however this was no different in either country (14 from KCH versus 15  
48  
49 at BCN. All infants in both cohorts survived to hospital discharge. See Table 1 for parental  
50  
51 responses as per each neonatal unit.  
52  
53  
54  
55  
56  
57  
58  
59  
60

1  
2  
3 The questionnaire incorporated a section where parents could write comments about their  
4 experience in the neonatal unit, including any suggestions they had to improve this. The  
5 results of the survey were shared in both units and acknowledged as part of service  
6 improvement.  
7  
8  
9  
10

### 11 12 13 14 15 16 17 **KCH comments**

18  
19  
20 Many parents expressed concern over the restrictions as they worried it would impact on  
21 how often they would be able to see their baby and bond with them, although they  
22 appreciated the reasons for this. Parents said it was “difficult with both parents not visiting  
23 together”, felt “one parent rule was punishing” and they “could not spend time as a family”.  
24 There were mothers who described having less time with their baby so that the fathers could  
25 also attend; one said it felt “rushed and stressful having to leave so the father can see the  
26 baby”. Some parents described the impact it had on their emotional well-being as well as  
27 mental health. For instance, one of them said she had “severe anxiety and was struggling  
28 without her partner’s support” and another parent said it was “very difficult to take turns to  
29 see our baby when we were under considerable emotional stress”. Difficulties were  
30 expressed balancing home life with frequent visits to the hospital, especially with siblings at  
31 home, as prior to the pandemic, siblings could be by the cotside or wait with their relatives  
32 and use the family facilities with relatives while waiting. One of them said it was “incredibly  
33 hard with a twin not allowed in”. Single parents requested being able to nominate a family  
34 member to provide additional support. A comment was made that opportunities to express  
35 breast milk were affected by limited spaces in the expressing room due to the need for social  
36 distancing. One parent also felt that having less time with the baby reduced feeding  
37 opportunities. A few parents voiced that although wearing a face mask was understandable,  
38 it also made bonding difficult. They expressed feeling “sad” that their baby had never seen  
39  
40  
41  
42  
43  
44  
45  
46  
47  
48  
49  
50  
51  
52  
53  
54  
55  
56  
57  
58  
59  
60

1  
2  
3 them without a mask. Parents worried that not being able to read their facial expressions  
4 might have consequences for the baby's development. A suggestion was made asking if  
5 doctors could offer regular conference calls to allow parents to discuss the medical care of  
6 their baby together. Parents said they "have been very impressed with the care and felt  
7 reassured their baby was in the best hands", "nurses and doctors are very helpful" and "staff  
8 do a good job with getting parents stuck in with cares and bonding". Overall, parents were  
9 very happy and thankful for the clinical care and continuous support provided, despite the  
10 challenges of the pandemic.  
11  
12  
13  
14  
15  
16  
17  
18  
19  
20  
21  
22

### 23 **BCN comments**

24  
25  
26 The quality of time parents spent with their infant was reported by one family to have been  
27 negatively affected by the pandemic, mostly by the wearing of face masks which did not  
28 allow the parents to kiss their baby. Furthermore, quality of time was reported to be reduced  
29 by not being able to have other family members visit their infant. Parents did however report  
30 finding it particularly exciting seeing their infant's name coloured on the wall next to their  
31 incubator and being able to use cameras to see them at any time.  
32  
33  
34  
35  
36  
37  
38  
39  
40  
41

### 42 **DISCUSSION**

43  
44  
45 We demonstrate that parents reported the overall quality of time spent with their infant to be  
46 reduced, especially when more restrictive policies were in place. This may also be related to  
47 the difficulties in travel to the hospital. Concerns were highlighted about parental emotional  
48 wellbeing, feelings of anxiety, bonding as a family and lack of support from partners.  
49  
50  
51  
52  
53  
54  
55

56  
57 We considered why variation in parental satisfaction between the two countries may exist.  
58  
59 Anxiety and apprehension during the first wave was high, with rates of major depressive  
60

1  
2  
3 symptoms in pregnant women within the UK peaking at 42%,[10] compared to a lower  
4 proportion in Spain reporting such symptoms (38%).[11] In our study parents with infants  
5 admitted to neonatal intensive care were asked to respond to the questionnaire during  
6 different waves of the pandemic. We speculate that the higher levels of self-reported quality  
7 time spent with infants and overall greater parental satisfaction in Barcelona than the UK  
8 may be secondary to previously reported lower baseline rates of depressive symptoms in  
9 pregnancy within the Spanish population. More so, parents in the UK were also asked to  
10 complete the questionnaire when visiting was most restrictive. Such differences in self-  
11 reported parental satisfaction within our study agree with a recent UK and US survey which  
12 explored varying policies between units, with a greater negative parental impact identified  
13 during stricter restrictions.[8]

14  
15  
16  
17  
18  
19  
20  
21  
22  
23  
24  
25  
26  
27  
28  
29  
30  
31  
32  
33  
34  
35  
36  
37  
38  
39  
40  
41  
42  
43  
44  
45  
46  
47  
48  
49  
50  
51  
52  
53  
54  
55  
56  
57  
58  
59  
60  
Muniraman and colleagues conducted a cross-sectional survey of parents impacted by  
restrictive policies in six tertiary neonatal units, from the UK and the USA assessing their  
visitation policies and impact on parents' ability to see, care for and bond with their infants. In  
a total of 231 responses they reported that the policies were perceived as restrictive by 62%  
of the respondents and 41% reporting being unable to bond enough. Mild to severe impact  
on breast feeding was reported by 36% (75/209) of respondents. Our study generally agrees  
with the above findings and complements the literature by reporting on two separate  
populations in two European countries with the Barcelona cohort coming later in time in the  
pandemic (up to February 2021 compared to August in 2020 in Muniraman et al.[8])

When considering important outcome related factors however, our questionnaire highlights  
that many parents within both the UK and Spain do not report a reduction in time spent  
breast-feeding or provision of kangaroo care. Over half of our respondents felt kangaroo  
care was not affected during the pandemic, which may be reflective of less strict restrictions.  
Indeed, this is much higher in comparison to a recent global survey of parental experiences

1  
2  
3 during the pandemic which found only less than half of respondents reported no change to  
4 the frequency of kangaroo care, however this global survey included some units where  
5 neither parent was allowed to visit during the restrictions.[3] Furthermore, parental  
6 satisfaction in receiving medical updates was not affected regardless of which pandemic  
7 restriction policy was employed.  
8  
9  
10  
11  
12

13  
14 Less restrictive measures were in place during completion of the questionnaire in Barcelona,  
15 when both parents were able to stay with their infant. Having both parents at the cot-side  
16 together may have facilitated kangaroo care, family-integrated care and receiving joint  
17 medical updates to both parents simultaneously.  
18  
19  
20  
21  
22

23  
24  
25 There were many comments made in our study regarding the impact on parental emotional  
26 wellbeing. It is crucial that health professionals remain vigilant in identifying parents who  
27 require additional emotional support and sign posting them to appropriate organisations.  
28  
29  
30  
31  
32

33  
34  
35 The availability of live video cameras within the neonatal unit in Spain for when parents were  
36 unable to see their infant may have been vital in parents feeling more involved with the care  
37 of the infant despite not being physical present. Our survey highlights the importance of  
38 incorporating different modalities into our clinical care such as telephone conferencing and  
39 secure video messaging. Indeed, one study reported that asynchronous video messaging  
40 supported models of family integrated care, improved parental experience and emotional  
41 closeness to their baby and built strong relationships between families and staff.[12]  
42  
43  
44  
45  
46  
47

48  
49 Furthermore, the use of cot-side cameras has been associated with a reduction in parental  
50 stress when infant separation occurs.[13] Such advancements in technology may thus be  
51 beneficial not only during future pandemics, but also in the provision and delivery of  
52 universal, sustainable and accessible neonatal care.  
53  
54  
55  
56  
57  
58  
59  
60

1  
2  
3 Utilisation of digital innovations as a standard of care when considering service provision  
4 and re-design of units may indeed remove some of the barriers and obstacles often currently  
5 experienced by parents and health care workers in being able to provide and promote family  
6 integrated care, and thus such advances may be a beneficial side-product of the  
7  
8  
9  
10  
11 pandemic.[14-16]

12  
13  
14 Mask wearing is a highly effective measure in reducing virus transmission at a population  
15 level.[17] The use of face masks was a recurring theme expressed by parents from both the  
16 UK and Spain. Wearing of face masks by parents whilst with their infant was identified as a  
17 particular source of anxiety in both countries with concern over the impact upon bonding.  
18 Indeed, there is little knowledge of this with respect to the longer-term consequences on  
19 infant neurodevelopment. Wearing of face masks may affect attachment processes between  
20 parents and their infant within the first few days of life when there is little exposure to and  
21 visualisation of parental facial expressions.[18] Suggested recommendations from the  
22 RCPCH with specific regard to face mask coverings is that consideration for removal should  
23 be given for asymptomatic parents when providing kangaroo care.[19] Furthermore, use of  
24 transparent facemasks or visors, alongside regularly talking through the mask, should be  
25 encouraged to enable bonding and attachment opportunities.[20] Balance of risk must be  
26 made however between the unknown adverse impact of face coverings on infant  
27 neurodevelopment with the global benefits of face masks in reducing virus transmission.  
28  
29  
30  
31  
32  
33  
34  
35  
36  
37  
38  
39  
40  
41  
42  
43  
44  
45  
46

47 The results of this survey were shared amongst both units and actions including updating  
48 unit policies, parents' facilities, psychological support on site and communication with  
49 parents have been taken to improve parental experience and service development. To  
50 improve care in both units and determine the benefits of differing approaches to the  
51 pandemic it would be interesting in future studies to conduct the same survey and data  
52 collection process in the same units over varying time periods during different restrictive  
53 measures of the pandemic.  
54  
55  
56  
57  
58  
59  
60



1  
2  
3  
4  
5  
6 This study has strengths and some limitations. We have surveyed parents from two tertiary  
7 neonatal intensive care units in Europe incorporating two different policies on parental  
8 restrictions during the Covid-19 pandemic. Answers from both cohorts of parents, with  
9 different restrictions, may therefore be useful in guiding further policies in future pandemics  
10 to ensure parental satisfaction is taken into consideration. Data were collected from KCH  
11 during the first wave of the pandemic when lock down restrictions were being enforced,  
12 thereby capturing an accurate depiction of parental experience in real time. Contrary to this,  
13 data from BCN were collected retrospectively and when less restrictive policies were in  
14 place, and as such may have positively impacted the reflections of parents who were at  
15 home when completing the form, hence the retrospective nature of the Spanish data  
16 collection acts as a limitation to the study. As responses from Spain were anonymous, it was  
17 not possible to determine how sick the infants were during admission, or how long post  
18 discharge the surveys were completed and how these influences may have further impacted  
19 parental views. Information on whether parents from either country were first time parents  
20 was also not collected. Finally, no control group pre-pandemic was included and we did not  
21 have survey responses to assess baseline perception involvement in care pre-pandemic,  
22 therefore, how self-reported parental satisfaction may have changed within each country  
23 when restrictions and policies were implemented could not be elicited.  
24  
25  
26  
27  
28  
29  
30  
31  
32  
33  
34  
35  
36  
37  
38  
39  
40  
41  
42  
43

44 The long-term impact of the pandemic upon parents and infants admitted to neonatal care is  
45 not known.  
46  
47  
48  
49  
50  
51

52 In conclusion, restrictive policies implemented due to the Covid-19 pandemic have affected  
53 families with infants admitted to neonatal intensive care. Quality of time spent with the  
54 babies was felt to be significantly affected, especially when more restrictive policies were  
55 implemented. Parental involvement in the care of their babies and satisfaction with the care  
56  
57  
58  
59  
60

1  
2  
3 that infants received and with medical and nursing updates, however, remained positive. The  
4 amount of time spent breastfeeding and giving Kangaroo Care decreased during the  
5 pandemic, but was not significantly different between the two units. Neonatal units need to  
6 find strategies to mitigate the impact of separation on parental experience and bonding if a  
7 similar situation occurs in the future.  
8  
9  
10  
11  
12

## 13 14 **ACKNOWLEDGEMENTS**

15  
16  
17 **Funding statement:** This research was supported by the National Institute for Health  
18 Research (NIHR) Biomedical Research Centre at Guy's and St Thomas' NHS Foundation  
19 Trust and King's College London. The views expressed are those of the authors and not  
20 necessarily those of the NHS, the NIHR or the Department of Health.  
21  
22  
23  
24

25 **Competing interest statement:** The authors have no conflict of interest to declare  
26  
27

### 28 **Authors contribution:**

29  
30  
31 Carolina Zorro designed the study, participated in the analysis of data and the writing of the  
32 manuscript  
33

34  
35 Eva MacRae participated in the design of the study, data acquisition, participated in the  
36 analysis and critically revised the manuscript  
37  
38

39  
40 Marta Teresa-Palacio acquired the data from BCN, participated in the analysis and critically  
41 reviewed the manuscript  
42

43  
44 Emma E. Williams participated in the analysis of data and the writing of the manuscript  
45

46  
47 Victoria Aldecoa-Bilbao acquired the data from BCN, participated in the analysis and  
48 critically reviewed the manuscript  
49

50  
51 Ravindra Bhat participated in the design of the study and critically reviewed the  
52 manuscript  
53

54  
55 Ann Hickey participated in the design of the study and critically reviewed the  
56 manuscript  
57  
58

59  
60 Theodore Dassios participated in the analysis of data and the writing of the manuscript

1  
2  
3 Anne Greenough supervised the project, participated in the design and  
4  
5 analysis of the study and critically revised the manuscript  
6  
7

8 **Data sharing statement:** Data will be shared on reasonable request  
9

10 **Patient consent:** All parents consented to take part in the survey  
11  
12  
13  
14  
15  
16  
17  
18  
19  
20  
21  
22  
23  
24  
25  
26  
27  
28  
29  
30  
31  
32  
33  
34  
35  
36  
37  
38  
39  
40  
41  
42  
43  
44  
45  
46  
47  
48  
49  
50  
51  
52  
53  
54  
55  
56  
57  
58  
59  
60

Confidential: For Review Only

1  
2  
3  
4  
5  
6  
7  
8  
9 **What is known about the subject**

- 10  
11  
12  
13  
14  
15  
16  
17  
18  
19  
20
- The COVID-19 pandemic has led to restrictive policies across neonatal units.
  - Parental policies varied between centers and over time, being stricter at the beginning of the pandemic.

21 **What this study adds**

- 22  
23  
24  
25  
26  
27  
28  
29  
30  
31  
32  
33  
34  
35  
36  
37  
38  
39  
40  
41  
42  
43  
44  
45  
46  
47  
48  
49  
50  
51  
52  
53  
54  
55  
56  
57  
58  
59  
60
- Despite the restrictive policies implemented satisfaction with the care that infants received and with medical updates remained positive.
  - Overall time spent in breastfeeding and in Kangaroo Care was affected by the pandemic but there were no differences between different policies.
  - The use of facemasks generated parental anxiety and difficulties in bonding with their babies.

**REFERENCES**

1. Organisation WH. Maintaining essential health services: operational guidance for the COVID-19 context interim guidance. 2020. p. 61.
2. Neonatologia SEd. Recommendations for management of newborns for SARS-CoV-2 infection. In: Neonatology SSo, editor. 2020. p. 16.
3. Kostenzer J, Hoffmann J, von Rosenstiel-Pulver C, et al. Neonatal care during the COVID-19 pandemic - a global survey of parents' experiences regarding infant and family-centred developmental care. *EClinicalMedicine* 2021;**39**:101056.
4. van Veenendaal NR, Deierl A, Bacchini F, et al. International Steering Committee for Family Integrated C. Supporting parents as essential care partners in neonatal units during the SARS-CoV-2 pandemic. *Acta Paediatr* 2021;**110**:2008-22.
5. Brown A, Shenker N. Experiences of breastfeeding during COVID-19: Lessons for future practical and emotional support. *Matern Child Nutr* 2021;**17**:e1388.
6. Ashini A, Alsoufi A, Elhadi M. Parental perception of neonatal ICU visitation during the COVID-19 pandemic. *Int J Gynaecol Obstet* 2021;**153**:554-5.
7. Darcy Mahoney A, White RD, Velasquez A, et al. Impact of restrictions on parental presence in neonatal intensive care units related to coronavirus disease 2019. *J Perinatol* 2020;**40**:36-46.
8. Muniraman H, Ali M, Cawley P, et al. Parental perceptions of the impact of neonatal unit visitation policies during COVID-19 pandemic. *BMJ Paediatr Open* 2020;**4**:e000899.
9. Fan J, Zhou M, Wei L, et al. A qualitative study on the psychological needs of hospitalized newborns' parents during COVID-19 outbreak in China. *Iran J Pediatr* 2020;**30**:e102748.

- 1  
2  
3 10. Ceulemans M, Foulon V, Ngo E, et al. Mental health status of pregnant and  
4 breastfeeding women during the COVID-19 pandemic-A multinational cross-sectional study.  
5  
6 *Acta Obstet Gynecol Scand* 2021;**100**:1219-29.  
7  
8
- 9  
10 11. Brik M, Sandonis MA, Fernandez S, et al. Psychological impact and social support in  
11 pregnant women during lockdown due to SARS-CoV2 pandemic: A cohort study. *Acta*  
12  
13 *Obstet Gynecol Scand* 2021;**100**:1026-33.  
14  
15
- 16 17. Kirolos S, Sutcliffe L, Giatsi Clausen M, et al. Asynchronous video messaging  
18 promotes family involvement and mitigates separation in neonatal care. *Arch Dis Child Fetal*  
19  
20 *Neonatal Ed* 2021;**106**:172-7.  
21  
22
- 23 24. Guttman K, Patterson C, Haines T, et al. Parent stress in relation to use of bedside  
25 telehealth, an initiative to improve family-centeredness of care in the neonatal intensive care  
26  
27 unit. *J Patient Exp* 2020;**7**:1378-83.  
28  
29
- 30 31. MacSween K, Fraser C, Clinton T, et al. Neonatal healthcare workers' perceptions of  
32 the impact of the COVID-19 pandemic. *Acta Paediatr* 2021;**110**:2814-6.  
33  
34
- 35 36. Waddington C, van Veenendaal NR, O'Brien K, et al. International Steering  
37 Committee for Family Integrated C. Family integrated care: Supporting parents as primary  
38  
39 caregivers in the neonatal intensive care unit. *Pediatr Investig* 2021;**5**:148-54.  
40  
41
- 42 43. Campbell-Yeo M, Dol J, Richardson B, et al. A co-design of clinical virtual care  
44 pathways to engage and support families requiring neonatal intensive care in response to  
45  
46 the COVID-19 pandemic (COVES study). *J Neonatal Nurs* 2021 [Epub ahead of print].  
47  
48
- 49 50. Howard J, Huang A, Li Z, et al. An evidence review of face masks against COVID-19.  
51  
52 *Proc Natl Acad Sci USA* 2021;**118**: e2014564118.  
53  
54
- 55 56. Green J, Staff L, Bromley P, et al. The implications of face masks for babies and  
57  
58 families during the COVID-19 pandemic: A discussion paper. *J Neonatal Nurs* 2021;**27**:21-5.  
59  
60

1  
2  
3 19. Health RCoPaC. BAPM - COVID-19: Frequently asked questions within neonatal  
4 services. In: RCPCH, editor. 2021.  
5  
6

7  
8 20. Verd S, Moll P, Serra C, et al. Mothers' masks should be improved or removed  
9 during pandemic as they inhibit bonding with neonates. *Acta Paediatr* 2021;**110**(5):1689.  
10  
11  
12

13  
14  
15  
16  
17  
18  
19  
20  
21  
22  
23  
24  
25  
26  
27  
28  
29  
30  
31  
32  
33  
34  
35  
36  
37  
38  
39  
40  
41  
42  
43  
44  
45  
46  
47  
48  
49  
50  
51  
52  
53  
54  
55  
56  
57  
58  
59  
60

Confidential: For Review Only

**Table 1: Parental responses as per each neonatal unit. Data are expressed as number with**

percent (%)

in brackets

|                                                                                                 | KCH [n=38 (%)] | BCN [n=36 (%)] |
|-------------------------------------------------------------------------------------------------|----------------|----------------|
| <b>How involved do you feel with the care of your baby?</b>                                     |                |                |
| <i>1=not at all</i>                                                                             | 0 (0.0)        | 0 (0.0)        |
| <i>2 = a little involved</i>                                                                    | 4 (10.5)       | 3 (8.3)        |
| <i>3 = quite involved</i>                                                                       | 17 (44.7)      | 7 (19.4)       |
| <i>4 = fully involved</i>                                                                       | 17 (44.7)      | 26 (72.2)      |
| <b>Do you feel that the pandemic has affected the quality of time you spend with your baby?</b> |                |                |
| <i>1=disimproved</i>                                                                            | 24 (63.2)      | 12 (33.3)      |
| <i>2=not at all</i>                                                                             | 13 (34.2)      | 19 (52.8)      |
| <i>3=improved</i>                                                                               | 1 (2.6)        | 4 (11.1)       |
| <i>4=not answered</i>                                                                           | 0 (0.0)        | 1 (2.8)        |
| <b>Has the pandemic affected the amount of time you spend giving kangaroo care?</b>             |                |                |
| <i>1=decreased</i>                                                                              | 13 (34.2)      | 6 (16.7)       |
| <i>2=not at all</i>                                                                             | 21 (55.3)      | 25 (69.4)      |
| <i>3=increased</i>                                                                              | 0 (0.0)        | 2 (5.6)        |
| <i>4=not applicable</i>                                                                         | 4 (10.5)       | 0 (0.0)        |
| <i>5 = not answered</i>                                                                         | 0 (0.0)        | 3 (8.3)        |
| <b>Has the pandemic affected the amount of time you spend breastfeeding?</b>                    |                |                |
| <i>1=decreased</i>                                                                              | 6 (15.8)       | 2 (5.6)        |
| <i>2=not at all</i>                                                                             | 14 (36.8)      | 30 (83.3)      |
| <i>3=increased</i>                                                                              | 0 (0.0)        | 1 (2.8)        |
| <i>4= not applicable</i>                                                                        | 18 (47.4)      | 0 (0.0)        |
| <i>5=not answered</i>                                                                           | 0 (0.0)        | 3 (8.3)        |



| <b>Are you satisfied with the updates from the medical and nursing staff regarding your baby?</b> |           |           |
|---------------------------------------------------------------------------------------------------|-----------|-----------|
| <i>1=very unsatisfied</i>                                                                         | 1 (2.6)   | 4 (11.1)  |
| <i>2=unsatisfied</i>                                                                              | 1 (2.6)   | 0 (0.0)   |
| <i>3=moderately satisfied</i>                                                                     | 6 (15.8)  | 2 (5.6)   |
| <i>4=satisfied</i>                                                                                | 21 (55.3) | 6 (16.7)  |
| <i>5=very satisfied</i>                                                                           | 9 (23.7)  | 24 (66.7) |
| <b>How have you found coming to the hospital to visit your baby?</b>                              |           |           |
| <i>1=very difficult</i>                                                                           | 5 (13.2)  | 5 (13.9)  |
| <i>2=sometimes difficult</i>                                                                      | 14 (36.8) | 15 (41.7) |
| <i>3=manageable</i>                                                                               | 11 (28.9) | 6 (16.7)  |
| <i>4=easy</i>                                                                                     | 8 (21.1)  | 9 (25.0)  |
| <i>5= not answered</i>                                                                            | 0 (0.0)   | 1 (2.8)   |

1  
2  
3 **FIGURE LEGENDS**  
4  
5

6 **Figure 1:** Consort diagram to portray participant inclusion per neonatal unit.  
7  
8  
9  
10  
11  
12  
13  
14  
15  
16  
17  
18  
19  
20  
21  
22  
23  
24  
25  
26  
27  
28  
29  
30  
31  
32  
33  
34  
35  
36  
37  
38  
39  
40  
41  
42  
43  
44  
45  
46  
47  
48  
49  
50  
51  
52  
53  
54  
55  
56  
57  
58  
59  
60

Confidential: For Review Only

1  
2  
3  
4  
5  
6  
7  
8  
9  
10  
11  
12  
13  
14  
15  
16  
17  
18  
19  
20  
21  
22  
23  
24  
25  
26  
27  
28  
29  
30  
31  
32  
33  
34  
35  
36  
37  
38  
39  
40  
41  
42  
43  
44  
45  
46  
47  
48  
49  
50  
51  
52  
53  
54  
55  
56  
57  
58  
59  
60

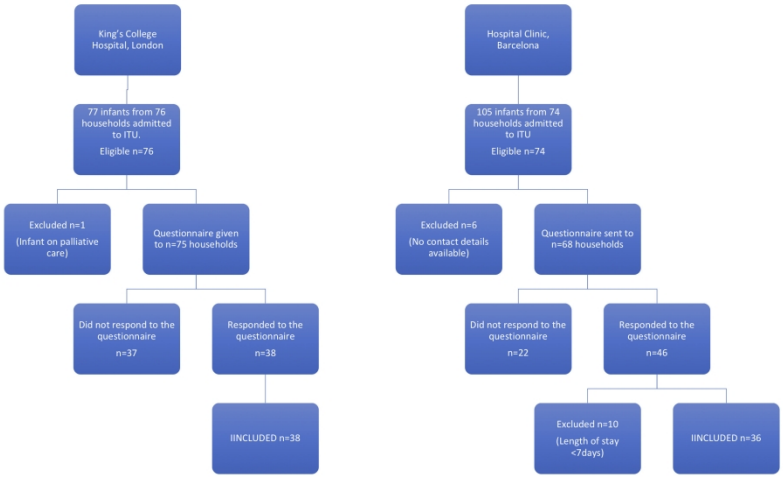

## Parental satisfaction questionnaire during COVID-19 pandemic

Hospital No:

This questionnaire is aimed at assessing whether you feel the coronavirus pandemic has affected your experience on NICU and bonding with your baby

1. How involved do you feel with the care of your baby (e.g. feeding, bathing, skin care, taking the temperature, changing the nappy)?
  - a. Not at all
  - b. A little involved
  - c. Quite Involved
  - d. Fully involved
2. Do you feel that the pandemic has affected the quality of time you spend with your baby?
  - a. Not at all
  - b. Improved quality of time
  - c. Disimproved quality of time
- 3a. Has the pandemic affected the amount of time you spend giving kangaroo care?
  - a. No at all
  - b. Increased
  - c. Decreased
  - d. Not applicable (please give a reason) \_\_\_\_\_
- 3b. How has the pandemic has affected the amount of time you spend breastfeeding your baby? (please specify if you have decided not to breastfeed)
  - a. Not at all
  - b. Increased
  - c. Decreased
  - d. Not applicable (please give a reason) \_\_\_\_\_
4. Are you satisfied with the updates from the medical and nursing staff regarding your baby?
  - a. Very unsatisfied
  - b. Unsatisfied
  - c. Moderately satisfied
  - d. Satisfied
  - e. Very satisfied

Parental satisfaction questionnaire during COVID-19 pandemic

1  
2  
3  
4  
5  
6  
7  
8  
9  
10  
11  
12  
13  
14  
15  
16  
17  
18  
19  
20  
21  
22  
23  
24  
25  
26  
27  
28  
29  
30  
31  
32  
33  
34  
35  
36  
37  
38  
39  
40  
41  
42  
43  
44  
45  
46  
47  
48  
49  
50  
51  
52  
53  
54  
55  
56  
57  
58  
59  
60

- 5 How have you found coming to the hospital to visit your baby?
  - a. Very difficult
  - b. Sometimes Difficult
  - c. Manageable
  - d. Easy

6 If you would like to add any comments or suggestions on any of the above, please complete the box below



Only

Go straight to content.

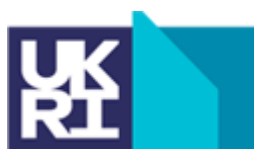

Medical  
Research  
Council

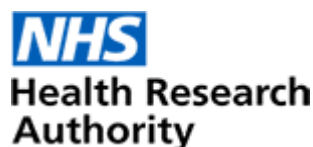

Is my study research?

**i** To print your result with title and IRAS Project ID please enter your details below:

Title of your research:

Assessing the impact of the Covid-19 pandemic on parental satisfaction in two European neonatal intensive care units

IRAS Project ID (if available):

You selected:

- **'No'** - Are the participants in your study randomised to different groups?
- **'No'** - Does your study protocol demand changing treatment/ patient care from accepted standards for any of the patients involved?
- **'No'** - Are your findings going to be generalisable?

**Your study would NOT be considered Research by the NHS.**

You may still need other approvals.

Researchers requiring further advice (e.g. those not confident with the outcome of this tool) should contact their R&D office or sponsor in the first instance, or the **HRA** to discuss your study. If contacting the HRA for advice, do this by sending an outline of the project (maximum one page), summarising its purpose, methodology, type of participant and planned location as well as a copy of this results page and a summary of the aspects of the decision(s) that you need further advice on to the HRA Queries Line at [Queries@hra.nhs.uk](mailto:Queries@hra.nhs.uk).

For more information please visit the [Defining Research](#) table.

[Follow this link to start again.](#)

NOTE: If using Internet Explorer please use browser print function.

[About this tool](#) [Feedback](#) [Contact](#) [Glossary](#) [Accessibility](#)

# BMJ Paediatrics Open

## Assessing the impact of the Covid-19 pandemic on parental satisfaction in two European neonatal intensive care units

|                               |                                                                                                                                                                                                                                                                                                                                                                                                                                                                                                                                                                                                                                                                                                                                                                                                                                                                                                                                                                                                                                                                                          |
|-------------------------------|------------------------------------------------------------------------------------------------------------------------------------------------------------------------------------------------------------------------------------------------------------------------------------------------------------------------------------------------------------------------------------------------------------------------------------------------------------------------------------------------------------------------------------------------------------------------------------------------------------------------------------------------------------------------------------------------------------------------------------------------------------------------------------------------------------------------------------------------------------------------------------------------------------------------------------------------------------------------------------------------------------------------------------------------------------------------------------------|
| Journal:                      | <i>BMJ Paediatrics Open</i>                                                                                                                                                                                                                                                                                                                                                                                                                                                                                                                                                                                                                                                                                                                                                                                                                                                                                                                                                                                                                                                              |
| Manuscript ID                 | bmjpo-2021-001396.R3                                                                                                                                                                                                                                                                                                                                                                                                                                                                                                                                                                                                                                                                                                                                                                                                                                                                                                                                                                                                                                                                     |
| Article Type:                 | Original research                                                                                                                                                                                                                                                                                                                                                                                                                                                                                                                                                                                                                                                                                                                                                                                                                                                                                                                                                                                                                                                                        |
| Date Submitted by the Author: | 11-May-2022                                                                                                                                                                                                                                                                                                                                                                                                                                                                                                                                                                                                                                                                                                                                                                                                                                                                                                                                                                                                                                                                              |
| Complete List of Authors:     | Zorro, Carolina; King's College Hospital NHS Foundation Trust<br>MacRae, Eva; King's College Hospital NHS Foundation Trust<br>Teresa-Palacio, Marta; Barcelona Clinic University Hospital Biomedical Diagnosis Center, Neonatology Department<br>Williams, Emma E.; King's College London, Department of Women and Children's Health<br>Aldecoa-Bilbao, Victoria; Barcelona Biomedical Research Park, Neonatology Department<br>Bhat, Ravindra; King's College Hospital NHS Foundation Trust, Neonatal Intensive Care Unit<br>Hickey, Ann; King's College Hospital NHS Foundation Trust, Neonatal Intensive Care Unit<br>Dassios, Theodore; King's College London, Department of Women and Children's Health, School of Life Sciences, Faculty of Life Science and Medicine; King's College Hospital NHS Foundation Trust, Neonatal Intensive Care Centre<br>Greenough, Anne; King's College London, Department of Women and Children's Health, School of Life Sciences, Faculty of Life Science and Medicine; King's College London, Asthma UK Centre for Allergic Mechanisms in Asthma |
| Keywords:                     | COVID-19, Neonatology                                                                                                                                                                                                                                                                                                                                                                                                                                                                                                                                                                                                                                                                                                                                                                                                                                                                                                                                                                                                                                                                    |
|                               |                                                                                                                                                                                                                                                                                                                                                                                                                                                                                                                                                                                                                                                                                                                                                                                                                                                                                                                                                                                                                                                                                          |

SCHOLARONE™  
Manuscripts



I, the Submitting Author has the right to grant and does grant on behalf of all authors of the Work (as defined in the below author licence), an exclusive licence and/or a non-exclusive licence for contributions from authors who are: i) UK Crown employees; ii) where BMJ has agreed a CC-BY licence shall apply, and/or iii) in accordance with the terms applicable for US Federal Government officers or employees acting as part of their official duties; on a worldwide, perpetual, irrevocable, royalty-free basis to BMJ Publishing Group Ltd ("BMJ") its licensees and where the relevant Journal is co-owned by BMJ to the co-owners of the Journal, to publish the Work in this journal and any other BMJ products and to exploit all rights, as set out in our [licence](#).

The Submitting Author accepts and understands that any supply made under these terms is made by BMJ to the Submitting Author unless you are acting as an employee on behalf of your employer or a postgraduate student of an affiliated institution which is paying any applicable article publishing charge ("APC") for Open Access articles. Where the Submitting Author wishes to make the Work available on an Open Access basis (and intends to pay the relevant APC), the terms of reuse of such Open Access shall be governed by a Creative Commons licence – details of these licences and which [Creative Commons](#) licence will apply to this Work are set out in our licence referred to above.

Other than as permitted in any relevant BMJ Author's Self Archiving Policies, I confirm this Work has not been accepted for publication elsewhere, is not being considered for publication elsewhere and does not duplicate material already published. I confirm all authors consent to publication of this Work and authorise the granting of this licence.



1  
2  
3 **Assessing the impact of the Covid-19 pandemic on parental satisfaction in two**  
4  
5 **European neonatal intensive care units**  
6  
7  
8  
9

10 Carolina Zorro<sup>1</sup>, Eva MacRae<sup>1</sup>, Marta Teresa-Palacio<sup>5</sup>, Emma E. Williams<sup>2</sup>, Victoria Aldecoa-  
11 Bilbao<sup>5</sup>, Ravindra Bhat<sup>1</sup>, Ann Hickey<sup>1</sup>, Theodore Dassios<sup>1,2</sup> and Anne Greenough<sup>2,3,4</sup>  
12  
13  
14  
15  
16  
17

18 <sup>1</sup> Neonatal Intensive Care Centre, King's College Hospital NHS Foundation Trust, London,  
19 United Kingdom  
20  
21

22 <sup>2</sup> Department of Women and Children's Health, School of Life Course Sciences, Faculty of  
23 Life Sciences and Medicine, King's College London, United Kingdom  
24  
25  
26

27 <sup>3</sup> Asthma UK Centre for Allergic Mechanisms in Asthma, King's College London, United  
28 Kingdom  
29  
30  
31

32 <sup>4</sup> NIHR Biomedical Research Centre based at Guy's and St Thomas' NHS Foundation Trust  
33 and King's College London, United Kingdom  
34  
35  
36

37 <sup>5</sup> Neonatology Department, Hospital Clinic Barcelona. BCNatal (Barcelona Center for  
38 Maternal-Foetal and Neonatal Medicine), Barcelona, Spain  
39  
40  
41  
42  
43  
44

45 Corresponding author: Carolina Zorro. Neonatal Intensive Care Centre, 4th Floor Golden  
46 Jubilee Wing, King's College Hospital, Denmark Hill, London, SE5 9RS, United Kingdom.  
47  
48 Tel: +44 0203 299 8744 ; E-mail: [carolina.zorro@nhs.net](mailto:carolina.zorro@nhs.net)  
49  
50  
51  
52  
53  
54

55 **Word count:** 3752  
56

57 **Key words:** Covid-19; parental satisfaction; neonatal care  
58  
59  
60

## ABSTRACT

**Background:** Neonatal units across the world have altered their policies to prevent the spread of infection during the Covid-19 pandemic. Our aim was to report parental experience in two European neonatal units during the pandemic.

**Methods:** Parents of infants admitted to each neonatal unit were asked to complete a questionnaire regarding their experience during the Covid-19 pandemic. At Kings College Hospital, UK (KCH) data were collected prospectively between June 2020 and August 2020 (first wave). At the Hospital Clínic Barcelona (BCN) data were collected retrospectively from parents whose infants were admitted between September 2020 and February 2021 (second and third wave).

**Results:** A total of 74 questionnaires were completed (38 from KCH and 36 from BCN). The parents reported that they were fully involved or involved in the care of their infants in 34 (89.4%) responses in KCH and 33 (91.6%) responses in BCN. Quality time spent with infants during the pandemic was more negatively affected at KCH compared to BCN [n=24 (63.2%) versus n=12 (33.3%]. Parents felt either satisfied or very satisfied with the updates from the clinical care team in 30 (79, 0%) responses at KCH and 30 (83, 4%) responses in BCN. The parents felt that the restrictions negatively affected breastfeeding in 6 (15.8%) responses at KCH and 2 (5.6%) responses in BCN. Travelling to the hospital was reported overall to be sometimes difficult (39.2%); this did not differ-between the two units [14 (36.8%) respondents at KCH and 15 (41.6%) from BCN]. Furthermore, the self-reported amount of time spent giving kangaroo care also did not differ between the two countries.

**Conclusion:** Restrictive policies implemented due to the Covid-19 pandemic had a negative impact on the perception of quality of time spent by parents with their newborns admitted to neonatal units.

## INTRODUCTION

The COVID-19 pandemic forced health care systems worldwide to introduce mitigating measures to reduce the impact of the disease. One of the recommendations was that “numbers of visitors and visiting periods should be highly restricted”. [1] The Royal College of Paediatrics and Child Health (RCPCH) and the British Association of Perinatal Medicine (BAPM) issued guidance to aid policy makers. [2] In response, many neonatal intensive care units amended their unit policies to maintain the safety of infants, parents and clinical staff, whilst continuing to promote family integrated care. The universal responses by most healthcare organisations in imposing restrictions particularly in the early stages, however, often did not consider the unique situation that arises with the mother-baby dyad. Furthermore, restrictions associated with the Covid-19 pandemic in relation to healthcare settings should be taken into account by both health professionals and policy makers as described in a recent global survey. [3] A recent review suggested that the restrictions implemented by neonatal units during the Covid-19 pandemic increased parent and infant separation and subsequently reduced the establishment of successful breast-feeding. [4] Furthermore, a joint UK and US survey of parental perceptions on visiting restrictions during the pandemic highlighted that parents reported reduced involvement and bonding experiences with their infant. [5] Those findings, together with baseline risks already associated with the perinatal and postnatal periods, could worsen long-term parental mental health when the heightened general anxiety around the pandemic is considered. [6] Indeed, parents report visiting restrictions limit their ability to bond and participate in their infant’s care, with concern expressed about receiving insufficient information and medical updates due to restrictions limiting ward round attendance. [5, 7, 8] Furthermore parents described having unmet requirements for emotional and psychological support and facing difficulties with transport, work and medical expenses following discharge. [9]

1  
2  
3 The aim of this observational study was to demonstrate the difference between how two  
4 European neonatal units changed their policies for parents during the pandemic and to  
5 describe parental satisfaction during this time. Specifically, we wanted to explore common  
6 themes experienced by families with infants admitted to intensive care during the pandemic  
7 in two healthcare settings in Europe.  
8  
9  
10  
11  
12  
13  
14  
15  
16

## 17 **METHODS**

18  
19  
20 An observational study was undertaken to describe parental experiences in two European  
21 neonatal intensive care units during the Covid-19 pandemic. The study was registered as a  
22 service evaluation with the Clinical Governance Department of King's College Hospital NHS  
23 Foundation Trust, London, UK and the Legal Department of Hospital Clínic Barcelona,  
24 Barcelona, Spain. The Health Research Authority Toolkit of the Medical Research Council,  
25 UK confirmed that the study would not be considered as research and would not require  
26 regulatory approval by a research ethics committee.  
27  
28  
29  
30  
31  
32  
33  
34  
35  
36

### 37 **London (KCH)**

38  
39  
40 The neonatal unit at King's College Hospital NHS Foundation Trust (London, UK) is a tertiary  
41 medical and surgical neonatal unit with an average of 700 annual admissions. It has a total  
42 bed capacity of 36, including 12 intensive care cots (ITU), 12 high dependency care cots  
43 (HDU), 12 special care (SCBU) cots and an isolation room. In 2020, there were 4,266 births  
44 with 575 infants admitted to the neonatal unit (13.4%), which was the lowest admission rate  
45 in the last 10 years. Of all the admissions 194 (33.7%) required intensive care, 261 (45.4%)  
46 were preterm <37 weeks and 100 (17.4%) weighed less than 1500 grams. Nursing staffing  
47 ratio was 1:1 to 1:2 in ITU, 1:2 in HDU and 1:4 in SCBU per shift and medical staffing ratio  
48 was 1:4 including middle grade doctors and consultants per weekday shift. Parent facilities  
49 on-site include a coffee room and a rest area with one rooming-in room. Pre-pandemic  
50  
51  
52  
53  
54  
55  
56  
57  
58  
59  
60

parental policies allowed both parents, grandparents, siblings and other family members to visit, with two adults at the cot-side at any one time. Changes to the unit policy at King's College Hospital during the Covid-19 pandemic were introduced in March 2020 following recommendations from the Royal College of Paediatrics and Child Health (RCPCH) and British Association of Perinatal Medicine (BAPM). Only one parent could stay with their baby at a time and no siblings (except twins) or other family members could visit. The parents' facilities including coffee room, rest area and rooming-in room were closed and parents were advised not to congregate in the reception area. Further, parents were advised to practice social distancing and to always wear face masks as per Government guidance. The unit continued to remain open for restrictive parental attendance 24/7. Parents were only able to spend time by their own infant's cot-side and advised to bring a separate shirt with them to the unit for kangaroo care. A maximum of four mothers were allowed in the expressing room. Parental craft skills and cares such as kangaroo care, nappy changes, skin care, feeding, bathing the baby and temperature measurements were all still actively encouraged. Furthermore, breast feeding support continued to be available every day of the week. When parents had to self-isolate, videocalls were arranged daily so they could see their baby. During the study period, there were no Covid-positive cases in infants admitted to the unit, but three parents tested positive for coronavirus and had to self-isolate.

### **Barcelona (BCN)**

The neonatal unit at Hospital Clínic Barcelona (Barcelona, Spain) is a tertiary neonatal unit with an average of 550 annual admissions. It has a total bed capacity of 28 including eight intensive care cots, eight high dependency care cots and 12 special care cots. In 2020, there were 3,295 births with 452 infants admitted to the neonatal unit (13.7%). From all the neonatal admissions, 211 (46.7%) required intensive care, 347 (76.7%) were preterm infants (<37 weeks) and 83 (23.9%) weighed less than 1500 grams. Nursing staffing ratio was 1:1 to 1:2 in ITU, 1:2 in HDU and 1:4 in SCBU per shift and medical staffing ratio was 1:4 to 1:4.6

1  
2  
3 including middle grade doctors and consultants per weekday shift. Parent facilities on-site  
4 include a coffee room and rest area and there are 15 live video cameras available in the unit  
5 for families to see their infant when unable to attend the unit. Pre-pandemic parental policies  
6 allowed both parents, grandparents and siblings to enter the unit in groups of two people  
7 each time and the unit remained opened 24/7. From March 2020, following the Spanish  
8 Society of Neonatology (*Sociedad Española de Neonatología*) (SENEO) recommendations  
9 to prevent the spread of COVID-19 infection, a restrictive parental policy was implemented.  
10 Only parents could see their baby, one at a time, and they were required to wear a face  
11 mask at all times whilst on the unit. The parent facilities remained opened 24/7 but only one  
12 family could use the parent room at any one time. From June 2020, a less restrictive  
13 parental policy was implemented and both parents could stay with their baby simultaneously,  
14 providing they did not have any coronavirus symptoms and had not been in contact with any  
15 person who had tested positive. There were no Covid-positive cases in babies admitted to  
16 the unit or their parents during the study period.  
17  
18  
19  
20  
21  
22  
23  
24  
25  
26  
27  
28  
29  
30  
31  
32  
33  
34  
35

### 36 **Questionnaire completion**

37  
38 This survey was performed as a service evaluation and improvement project and therefore  
39 ethical approval was not sought. Parents were invited to voluntarily participate and  
40 understood the aim of the survey. All answers were anonymized, and all patient identifiable  
41 information was removed to preserve confidentiality and privacy. The survey was designed  
42 by one of the doctors at KCH. A similar neonatal unit in Spain was identified, with the aim to  
43 have a broader view of the parental experience during the pandemic. Only one questionnaire  
44 was provided per household, so if parents had multiple infants (eg. twins) admitted to the  
45 neonatal unit then they were invited only to participate once. See Figure 1 for infant eligibility  
46 and inclusion per neonatal unit.  
47  
48  
49  
50  
51  
52  
53  
54  
55  
56  
57  
58  
59  
60

1  
2  
3 Parents of infants admitted to Kings College Hospital, UK (KCH) neonatal intensive care unit  
4 were asked to complete a questionnaire prospectively regarding their experience during the  
5 Covid-19 pandemic. The parents were approached by the member of the medical team who  
6 was leading the survey, who discussed the aim of the survey with them and, after giving  
7 verbal consent, they received a written questionnaire and completed this while their baby  
8 was still admitted. Questionnaire responses were anonymized after completion and data  
9 collected using a Microsoft Excel spreadsheet.  
10  
11  
12  
13  
14  
15  
16  
17  
18  
19  
20

21 Families of babies admitted to the Hospital Clinic in Barcelona are asked to provide contact  
22 details and an email address at the beginning of the admission and when they provided it,  
23 they consent to be contacted via email. The hospital has a quality and safety management  
24 program ("ISO 9001" and "UNE179003") by which questionnaires are sent via the online  
25 statistical survey application "Lyme Survey" which meets legal requirements of confidentiality  
26 and by completing them, they consent to its final use. Parents of infants admitted to the  
27 Hospital Clinic, Barcelona (BCN) neonatal intensive care unit were asked retrospectively to  
28 complete the same questionnaire used at KCH. One questionnaire was given to each  
29 household and completed anonymously.  
30  
31  
32  
33  
34  
35  
36  
37  
38  
39  
40  
41  
42  
43

44 Parents were eligible to complete the survey if their infant was admitted to the neonatal unit  
45 for at least one week. Parents of infants receiving palliative care were excluded from the  
46 study. The questionnaire contained only six questions aimed at assessing parental  
47 experience during the pandemic, and hence would be rapid and burden free for parents to  
48 complete. The questionnaire considered specific Covid-19 guidance laid out by the RCPCH,  
49 BAPM, SENEIO and the neonatal charity Bliss. Furthermore, parents were also requested to  
50 give free text recommendations as to how the service could be improved during the  
51 pandemic.  
52  
53  
54  
55  
56  
57  
58  
59  
60

1  
2  
3  
4  
5  
6 At KCH data were collected prospectively over a six-week period, between 25<sup>th</sup> June 2020 to  
7  
8 5<sup>th</sup> August 2020 (first wave). At BCN the data were collected retrospectively from parents  
9  
10 whose infants were admitted between 22<sup>nd</sup> September 2020 to 28<sup>th</sup> February 2021 (second  
11  
12 and third wave) and when less restrictive parental policies were in place.  
13

### 14 15 **Patient and Public Involvement**

16  
17  
18 It was not possible to involve patients or the public in the design, or conduct, or reporting, or  
19  
20 dissemination plans of our research due to the unpredicted nature of the Covid pandemic  
21  
22 and associated restrictions.  
23  
24  
25

### 26 27 **RESULTS**

28  
29  
30 A total of 74 questionnaires were analysed, 38 from KCH and 36 from BCN. Just over half of  
31  
32 the parents felt fully involved with the care of their infant (n=43; 58.1%), however this was  
33  
34 larger in BCN compared to KCH [n=26 (72.2%) versus n=17 (44.7%)]. Quality time spent  
35  
36 with infants during the pandemic was more negatively affected in KCH compared to BCN  
37  
38 [n=24 (63.2%) versus n=12 (33.3%)]. For both countries, 44 (59.5%) responders reported  
39  
40 the pandemic did not affect the time spent breastfeeding, and 46 (62.2%) reported giving  
41  
42 Kangaroo Care was mostly unchanged. Parents from both units were satisfied with clinical  
43  
44 updates from medical and nursing staff throughout the pandemic. Travelling back and forth  
45  
46 to the hospital to see their infant was reported overall to be sometimes difficult in 29  
47  
48 responses (39.2%), however this was no different in either country (14 from KCH versus 15  
49  
50 at BCN. All infants in both cohorts survived to hospital discharge. See Table 1 for parental  
51  
52 responses as per each neonatal unit.  
53  
54  
55  
56  
57  
58  
59  
60



1  
2  
3 The questionnaire incorporated a section where parents could write comments about their  
4 experience in the neonatal unit, including any suggestions they had to improve this. The  
5 results of the survey were shared in both units and acknowledged as part of service  
6 improvement.  
7  
8  
9  
10

### 11 12 13 14 15 16 17 18 **KCH comments**

19  
20 Many parents expressed concern over the restrictions as they worried it would impact on  
21 how often they would be able to see their baby and bond with them, although they  
22 appreciated the reasons for this. Parents said it was “difficult with both parents not visiting  
23 together”, felt “one parent rule was punishing” and they “could not spend time as a family”.  
24 There were mothers who described having less time with their baby so that the fathers could  
25 also attend; one said it felt “rushed and stressful having to leave so the father can see the  
26 baby”. Some parents described the impact it had on their emotional well-being as well as  
27 mental health. For instance, one of them said she had “severe anxiety and was struggling  
28 without her partner’s support” and another parent said it was “very difficult to take turns to  
29 see our baby when we were under considerable emotional stress”. Difficulties were  
30 expressed balancing home life with frequent visits to the hospital, especially with siblings at  
31 home, as prior to the pandemic, siblings could be by the cotside or wait with their relatives  
32 and use the family facilities with relatives while waiting. One of them said it was “incredibly  
33 hard with a twin not allowed in”. Single parents requested being able to nominate a family  
34 member to provide additional support. A comment was made that opportunities to express  
35 breast milk were affected by limited spaces in the expressing room due to the need for social  
36 distancing. One parent also felt that having less time with the baby reduced feeding  
37 opportunities. A few parents voiced that although wearing a face mask was understandable,  
38 it also made bonding difficult. They expressed feeling “sad” that their baby had never seen  
39  
40  
41  
42  
43  
44  
45  
46  
47  
48  
49  
50  
51  
52  
53  
54  
55  
56  
57  
58  
59  
60

1  
2  
3 them without a mask. Parents worried that not being able to read their facial expressions  
4 might have consequences for the baby's development. A suggestion was made asking if  
5 doctors could offer regular conference calls to allow parents to discuss the medical care of  
6 their baby together. Parents said they "have been very impressed with the care and felt  
7 reassured their baby was in the best hands", "nurses and doctors are very helpful" and "staff  
8 do a good job with getting parents stuck in with cares and bonding". Overall, parents were  
9 very happy and thankful for the clinical care and continuous support provided, despite the  
10 challenges of the pandemic.  
11  
12  
13  
14  
15  
16  
17  
18  
19  
20  
21  
22

### 23 **BCN comments**

24  
25  
26 The quality of time parents spent with their infant was reported by one family to have been  
27 negatively affected by the pandemic, mostly by the wearing of face masks which did not  
28 allow the parents to kiss their baby. Furthermore, quality of time was reported to be reduced  
29 by not being able to have other family members visit their infant. Parents did however report  
30 finding it particularly exciting seeing their infant's name coloured on the wall next to their  
31 incubator and being able to use cameras to see them at any time.  
32  
33  
34  
35  
36  
37  
38  
39  
40  
41

### 42 **DISCUSSION**

43  
44  
45 We demonstrate that parents reported the overall quality of time spent with their infant to be  
46 reduced, especially when more restrictive policies were in place. This may also be related to  
47 the difficulties in travel to the hospital. Concerns were highlighted about parental emotional  
48 wellbeing, feelings of anxiety, bonding as a family and lack of support from partners.  
49  
50  
51  
52  
53  
54  
55

56  
57 We considered why variation in parental satisfaction between the two countries may exist.  
58  
59 Anxiety and apprehension during the first wave was high, with rates of major depressive  
60

1  
2  
3 symptoms in pregnant women within the UK peaking at 42%,[10] compared to a lower  
4 proportion in Spain reporting such symptoms (38%).[11] In our study parents with infants  
5 admitted to neonatal intensive care were asked to respond to the questionnaire during  
6 different waves of the pandemic. We speculate that the higher levels of self-reported quality  
7 time spent with infants and overall greater parental satisfaction in Barcelona than the UK  
8 may be secondary to previously reported lower baseline rates of depressive symptoms in  
9 pregnancy within the Spanish population. More so, parents in the UK were also asked to  
10 complete the questionnaire when visiting was most restrictive. Such differences in self-  
11 reported parental satisfaction within our study agree with a recent UK and US survey which  
12 explored varying policies between units, with a greater negative parental impact identified  
13 during stricter restrictions.[8]

14  
15  
16  
17  
18  
19  
20  
21  
22  
23  
24  
25  
26  
27  
28  
29  
30 Muniraman and colleagues conducted a cross-sectional survey of parents impacted by  
31 restrictive policies in six tertiary neonatal units, from the UK and the USA assessing their  
32 visitation policies and impact on parents' ability to see, care for and bond with their infants. In  
33 a total of 231 responses they reported that the policies were perceived as restrictive by 62%  
34 of the respondents and 41% reporting being unable to bond enough. Mild to severe impact  
35 on breast feeding was reported by 36% (75/209) of respondents. Our study generally agrees  
36 with the above findings and complements the literature by reporting on two separate  
37 populations in two European countries with the Barcelona cohort coming later in time in the  
38 pandemic (up to February 2021 compared to August in 2020 in Muniraman et al.[8])

39  
40  
41  
42  
43  
44  
45  
46  
47  
48  
49  
50  
51 When considering important outcome related factors however, our questionnaire highlights  
52 that many parents within both the UK and Spain do not report a reduction in time spent  
53 breast-feeding or provision of kangaroo care. Over half of our respondents felt kangaroo  
54 care was not affected during the pandemic, which may be reflective of less strict restrictions.  
55 Indeed, this is much higher in comparison to a recent global survey of parental experiences

1  
2  
3 during the pandemic which found only less than half of respondents reported no change to  
4 the frequency of kangaroo care, however this global survey included some units where  
5 neither parent was allowed to visit during the restrictions.[3] Furthermore, parental  
6 satisfaction in receiving medical updates was not affected regardless of which pandemic  
7 restriction policy was employed.  
8  
9  
10  
11  
12

13  
14 Less restrictive measures were in place during completion of the questionnaire in Barcelona,  
15 when both parents were able to stay with their infant. Having both parents at the cot-side  
16 together may have facilitated kangaroo care, family-integrated care and receiving joint  
17 medical updates to both parents simultaneously.  
18  
19  
20  
21  
22

23  
24  
25 There were many comments made in our study regarding the impact on parental emotional  
26 wellbeing. It is crucial that health professionals remain vigilant in identifying parents who  
27 require additional emotional support and sign posting them to appropriate organisations.  
28  
29  
30  
31  
32

33  
34  
35 The availability of live video cameras within the neonatal unit in Spain for when parents were  
36 unable to see their infant may have been vital in parents feeling more involved with the care  
37 of the infant despite not being physical present. Our survey highlights the importance of  
38 incorporating different modalities into our clinical care such as telephone conferencing and  
39 secure video messaging. Indeed, one study reported that asynchronous video messaging  
40 supported models of family integrated care, improved parental experience and emotional  
41 closeness to their baby and built strong relationships between families and staff.[12]  
42  
43  
44  
45  
46  
47

48  
49 Furthermore, the use of cot-side cameras has been associated with a reduction in parental  
50 stress when infant separation occurs.[13] Such advancements in technology may thus be  
51 beneficial not only during future pandemics, but also in the provision and delivery of  
52 universal, sustainable and accessible neonatal care.  
53  
54  
55  
56  
57  
58  
59  
60

1  
2  
3 Utilisation of digital innovations as a standard of care when considering service provision  
4 and re-design of units may indeed remove some of the barriers and obstacles often currently  
5 experienced by parents and health care workers in being able to provide and promote family  
6 integrated care, and thus such advances may be a beneficial side-product of the  
7  
8  
9  
10  
11 pandemic.[14-16]

12  
13  
14 Mask wearing is a highly effective measure in reducing virus transmission at a population  
15 level.[17] The use of face masks was a recurring theme expressed by parents from both the  
16 UK and Spain. Wearing of face masks by parents whilst with their infant was identified as a  
17 particular source of anxiety in both countries with concern over the impact upon bonding.  
18 Indeed, there is little knowledge of this with respect to the longer-term consequences on  
19 infant neurodevelopment. Wearing of face masks may affect attachment processes between  
20 parents and their infant within the first few days of life when there is little exposure to and  
21 visualisation of parental facial expressions.[18] Suggested recommendations from the  
22 RCPCH with specific regard to face mask coverings is that consideration for removal should  
23 be given for asymptomatic parents when providing kangaroo care.[19] Furthermore, use of  
24 transparent facemasks or visors, alongside regularly talking through the mask, should be  
25 encouraged to enable bonding and attachment opportunities.[20] Balance of risk must be  
26 made however between the unknown adverse impact of face coverings on infant  
27 neurodevelopment with the global benefits of face masks in reducing virus transmission.  
28  
29  
30  
31  
32  
33  
34  
35  
36  
37  
38  
39  
40  
41  
42  
43  
44  
45  
46

47 The results of this survey were shared amongst both units and actions including updating  
48 unit policies, parents' facilities, psychological support on site and communication with  
49 parents have been taken to improve parental experience and service development. To  
50 improve care in both units and determine the benefits of differing approaches to the  
51 pandemic it would be interesting in future studies to conduct the same survey and data  
52 collection process in the same units over varying time periods during different restrictive  
53 measures of the pandemic.  
54  
55  
56  
57  
58  
59  
60

1  
2  
3  
4  
5  
6 This study has strengths and some limitations. We have surveyed parents from two tertiary  
7 neonatal intensive care units in Europe incorporating two different policies on parental  
8 restrictions during the Covid-19 pandemic. Answers from both cohorts of parents, with  
9 different restrictions, may therefore be useful in guiding further policies in future pandemics  
10 to ensure parental satisfaction is taken into consideration. Data were collected from KCH  
11 during the first wave of the pandemic when lock down restrictions were being enforced,  
12 thereby capturing an accurate depiction of parental experience in real time. Contrary to this,  
13 data from BCN were collected retrospectively and when less restrictive policies were in  
14 place, and as such may have positively impacted the reflections of parents who were at  
15 home when completing the form, hence the retrospective nature of the Spanish data  
16 collection acts as a limitation to the study. As responses from Spain were anonymous, it was  
17 not possible to determine how sick the infants were during admission, or how long post  
18 discharge the surveys were completed and how these influences may have further impacted  
19 parental views. Information on whether parents from either country were first time parents  
20 was also not collected. Finally, no control group pre-pandemic was included and we did not  
21 have survey responses to assess baseline perception involvement in care pre-pandemic,  
22 therefore, how self-reported parental satisfaction may have changed within each country  
23 when restrictions and policies were implemented could not be elicited.  
24  
25  
26  
27  
28  
29  
30  
31  
32  
33  
34  
35  
36  
37  
38  
39  
40  
41  
42  
43

44 The long-term impact of the pandemic upon parents and infants admitted to neonatal care is  
45 not known.  
46  
47  
48  
49  
50  
51

52 In conclusion, restrictive policies implemented due to the Covid-19 pandemic have affected  
53 families with infants admitted to neonatal intensive care. Quality of time spent with the  
54 babies was felt to be significantly affected, especially when more restrictive policies were  
55 implemented. Parental involvement in the care of their babies and satisfaction with the care  
56  
57  
58  
59  
60

1  
2  
3 that infants received and with medical and nursing updates, however, remained positive. The  
4 amount of time spent breastfeeding and giving Kangaroo Care decreased during the  
5 pandemic, but was not significantly different between the two units. Neonatal units need to  
6 find strategies to mitigate the impact of separation on parental experience and bonding if a  
7 similar situation occurs in the future.  
8  
9  
10  
11  
12

## 13 14 **ACKNOWLEDGEMENTS**

15  
16  
17 **Funding statement:** This research was supported by the National Institute for Health  
18 Research (NIHR) Biomedical Research Centre at Guy's and St Thomas' NHS Foundation  
19 Trust and King's College London. The views expressed are those of the authors and not  
20 necessarily those of the NHS, the NIHR or the Department of Health.  
21  
22  
23

24  
25 **Competing interest statement:** The authors have no conflict of interest to declare  
26  
27

### 28 **Authors contribution:**

29  
30  
31 Carolina Zorro designed the study, participated in the analysis of data and the writing of the  
32 manuscript  
33

34  
35 Eva MacRae participated in the design of the study, data acquisition, participated in the  
36 analysis and critically revised the manuscript  
37  
38

39  
40 Marta Teresa-Palacio acquired the data from BCN, participated in the analysis and critically  
41 reviewed the manuscript  
42

43  
44 Emma E. Williams participated in the analysis of data and the writing of the manuscript  
45

46  
47 Victoria Aldecoa-Bilbao acquired the data from BCN, participated in the analysis and  
48 critically reviewed the manuscript  
49

50  
51 Ravindra Bhat participated in the design of the study and critically reviewed the  
52 manuscript  
53

54  
55 Ann Hickey participated in the design of the study and critically reviewed the  
56 manuscript  
57  
58

59  
60 Theodore Dassios participated in the analysis of data and the writing of the manuscript

1  
2  
3 Anne Greenough supervised the project, participated in the design and  
4  
5 analysis of the study and critically revised the manuscript  
6  
7

8 **Data sharing statement:** Data will be shared on reasonable request  
9

10 **Patient consent:** All parents consented to take part in the survey  
11  
12  
13  
14  
15  
16  
17  
18  
19  
20  
21  
22  
23  
24  
25  
26  
27  
28  
29  
30  
31  
32  
33  
34  
35  
36  
37  
38  
39  
40  
41  
42  
43  
44  
45  
46  
47  
48  
49  
50  
51  
52  
53  
54  
55  
56  
57  
58  
59  
60

Confidential: For Review Only



1  
2  
3  
4  
5  
6  
7  
8  
9 **What is known about the subject**

- 10  
11  
12  
13  
14  
15  
16  
17  
18  
19  
20
- The COVID-19 pandemic has led to restrictive policies across neonatal units.
  - Parental policies varied between centers and over time, being stricter at the beginning of the pandemic.

21 **What this study adds**

- 22  
23  
24  
25  
26  
27  
28  
29  
30  
31  
32  
33  
34  
35  
36  
37  
38  
39  
40  
41  
42  
43  
44  
45  
46  
47  
48  
49  
50  
51  
52  
53  
54  
55  
56  
57  
58  
59  
60
- Despite the restrictive policies implemented satisfaction with the care that infants received and with medical updates remained positive.
  - Overall time spent in breastfeeding and in Kangaroo Care was affected by the pandemic but there were no differences between different policies.
  - The use of facemasks generated parental anxiety and difficulties in bonding with their babies.

## REFERENCES

1. Organisation WH. Maintaining essential health services: operational guidance for the COVID-19 context interim guidance. 2020. p. 61.
2. Neonatologia SEd. Recommendations for management of newborns for SARS-CoV-2 infection. In: Neonatology SSo, editor. 2020. p. 16.
3. Kostenzer J, Hoffmann J, von Rosenstiel-Pulver C, et al. Neonatal care during the COVID-19 pandemic - a global survey of parents' experiences regarding infant and family-centred developmental care. *EClinicalMedicine* 2021;**39**:101056.
4. van Veenendaal NR, Deierl A, Bacchini F, et al. International Steering Committee for Family Integrated C. Supporting parents as essential care partners in neonatal units during the SARS-CoV-2 pandemic. *Acta Paediatr* 2021;**110**:2008-22.
5. Brown A, Shenker N. Experiences of breastfeeding during COVID-19: Lessons for future practical and emotional support. *Matern Child Nutr* 2021;**17**:e1388.
6. Ashini A, Alsoufi A, Elhadi M. Parental perception of neonatal ICU visitation during the COVID-19 pandemic. *Int J Gynaecol Obstet* 2021;**153**:554-5.
7. Darcy Mahoney A, White RD, Velasquez A, et al. Impact of restrictions on parental presence in neonatal intensive care units related to coronavirus disease 2019. *J Perinatol* 2020;**40**:36-46.
8. Muniraman H, Ali M, Cawley P, et al. Parental perceptions of the impact of neonatal unit visitation policies during COVID-19 pandemic. *BMJ Paediatr Open* 2020;**4**:e000899.
9. Fan J, Zhou M, Wei L, et al. A qualitative study on the psychological needs of hospitalized newborns' parents during COVID-19 outbreak in China. *Iran J Pediatr* 2020;**30**:e102748.

- 1  
2  
3 10. Ceulemans M, Foulon V, Ngo E, et al. Mental health status of pregnant and  
4 breastfeeding women during the COVID-19 pandemic-A multinational cross-sectional study.  
5  
6 *Acta Obstet Gynecol Scand* 2021;**100**:1219-29.  
7  
8  
9
- 10 11. Brik M, Sandonis MA, Fernandez S, et al. Psychological impact and social support in  
11 pregnant women during lockdown due to SARS-CoV2 pandemic: A cohort study. *Acta*  
12  
13 *Obstet Gynecol Scand* 2021;**100**:1026-33.  
14  
15  
16
- 17 18. Kirolos S, Sutcliffe L, Giatsi Clausen M, et al. Asynchronous video messaging  
18 promotes family involvement and mitigates separation in neonatal care. *Arch Dis Child Fetal*  
19  
20 *Neonatal Ed* 2021;**106**:172-7.  
21  
22  
23
- 24 25. Guttman K, Patterson C, Haines T, et al. Parent stress in relation to use of bedside  
26 telehealth, an initiative to improve family-centeredness of care in the neonatal intensive care  
27  
28 unit. *J Patient Exp* 2020;**7**:1378-83.  
29  
30  
31
- 32 33. MacSween K, Fraser C, Clinton T, et al. Neonatal healthcare workers' perceptions of  
33 the impact of the COVID-19 pandemic. *Acta Paediatr* 2021;**110**:2814-6.  
34  
35  
36
- 37 38. Waddington C, van Veenendaal NR, O'Brien K, et al. International Steering  
38 Committee for Family Integrated C. Family integrated care: Supporting parents as primary  
39  
40 caregivers in the neonatal intensive care unit. *Pediatr Investig* 2021;**5**:148-54.  
41  
42  
43
- 44 45. Campbell-Yeo M, Dol J, Richardson B, et al. A co-design of clinical virtual care  
45 pathways to engage and support families requiring neonatal intensive care in response to  
46  
47 the COVID-19 pandemic (COVES study). *J Neonatal Nurs* 2021 [Epub ahead of print].  
48  
49  
50
- 51 52. Howard J, Huang A, Li Z, et al. An evidence review of face masks against COVID-19.  
52  
53 *Proc Natl Acad Sci USA* 2021;**118**: e2014564118.  
54  
55  
56
- 57 58. Green J, Staff L, Bromley P, et al. The implications of face masks for babies and  
57  
58 families during the COVID-19 pandemic: A discussion paper. *J Neonatal Nurs* 2021;**27**:21-5.  
59  
60

1  
2  
3 19. Health RCoPaC. BAPM - COVID-19: Frequently asked questions within neonatal  
4 services. In: RCPCH, editor. 2021.  
5  
6

7  
8 20. Verd S, Moll P, Serra C, et al. Mothers' masks should be improved or removed  
9 during pandemic as they inhibit bonding with neonates. *Acta Paediatr* 2021;**110**(5):1689.  
10  
11  
12

13  
14  
15  
16  
17  
18  
19  
20  
21  
22  
23  
24  
25  
26  
27  
28  
29  
30  
31  
32  
33  
34  
35  
36  
37  
38  
39  
40  
41  
42  
43  
44  
45  
46  
47  
48  
49  
50  
51  
52  
53  
54  
55  
56  
57  
58  
59  
60

Confidential: For Review Only

**Table 1: Parental responses as per each neonatal unit. Data are expressed as number with**

percent (%)

in brackets

|                                                                                                 | KCH [n=38 (%)] | BCN [n=36 (%)] |
|-------------------------------------------------------------------------------------------------|----------------|----------------|
| <b>How involved do you feel with the care of your baby?</b>                                     |                |                |
| <i>1=not at all</i>                                                                             | 0 (0.0)        | 0 (0.0)        |
| <i>2 = a little involved</i>                                                                    | 4 (10.5)       | 3 (8.3)        |
| <i>3 = quite involved</i>                                                                       | 17 (44.7)      | 7 (19.4)       |
| <i>4 = fully involved</i>                                                                       | 17 (44.7)      | 26 (72.2)      |
| <b>Do you feel that the pandemic has affected the quality of time you spend with your baby?</b> |                |                |
| <i>1=disimproved</i>                                                                            | 24 (63.2)      | 12 (33.3)      |
| <i>2=not at all</i>                                                                             | 13 (34.2)      | 19 (52.8)      |
| <i>3=improved</i>                                                                               | 1 (2.6)        | 4 (11.1)       |
| <i>4=not answered</i>                                                                           | 0 (0.0)        | 1 (2.8)        |
| <b>Has the pandemic affected the amount of time you spend giving kangaroo care?</b>             |                |                |
| <i>1=decreased</i>                                                                              | 13 (34.2)      | 6 (16.7)       |
| <i>2=not at all</i>                                                                             | 21 (55.3)      | 25 (69.4)      |
| <i>3=increased</i>                                                                              | 0 (0.0)        | 2 (5.6)        |
| <i>4=not applicable</i>                                                                         | 4 (10.5)       | 0 (0.0)        |
| <i>5 = not answered</i>                                                                         | 0 (0.0)        | 3 (8.3)        |
| <b>Has the pandemic affected the amount of time you spend breastfeeding?</b>                    |                |                |
| <i>1=decreased</i>                                                                              | 6 (15.8)       | 2 (5.6)        |
| <i>2=not at all</i>                                                                             | 14 (36.8)      | 30 (83.3)      |
| <i>3=increased</i>                                                                              | 0 (0.0)        | 1 (2.8)        |
| <i>4= not applicable</i>                                                                        | 18 (47.4)      | 0 (0.0)        |
| <i>5=not answered</i>                                                                           | 0 (0.0)        | 3 (8.3)        |

| <b>Are you satisfied with the updates from the medical and nursing staff regarding your baby?</b> |           |           |
|---------------------------------------------------------------------------------------------------|-----------|-----------|
| <i>1=very unsatisfied</i>                                                                         | 1 (2.6)   | 4 (11.1)  |
| <i>2=unsatisfied</i>                                                                              | 1 (2.6)   | 0 (0.0)   |
| <i>3=moderately satisfied</i>                                                                     | 6 (15.8)  | 2 (5.6)   |
| <i>4=satisfied</i>                                                                                | 21 (55.3) | 6 (16.7)  |
| <i>5=very satisfied</i>                                                                           | 9 (23.7)  | 24 (66.7) |
| <b>How have you found coming to the hospital to visit your baby?</b>                              |           |           |
| <i>1=very difficult</i>                                                                           | 5 (13.2)  | 5 (13.9)  |
| <i>2=sometimes difficult</i>                                                                      | 14 (36.8) | 15 (41.7) |
| <i>3=manageable</i>                                                                               | 11 (28.9) | 6 (16.7)  |
| <i>4=easy</i>                                                                                     | 8 (21.1)  | 9 (25.0)  |
| <i>5= not answered</i>                                                                            | 0 (0.0)   | 1 (2.8)   |

1  
2  
3 **FIGURE LEGENDS**  
4  
5

6 **Figure 1:** Consort diagram to portray participant inclusion per neonatal unit.  
7  
8  
9  
10  
11  
12  
13  
14  
15  
16  
17  
18  
19  
20  
21  
22  
23  
24  
25  
26  
27  
28  
29  
30  
31  
32  
33  
34  
35  
36  
37  
38  
39  
40  
41  
42  
43  
44  
45  
46  
47  
48  
49  
50  
51  
52  
53  
54  
55  
56  
57  
58  
59  
60

Confidential: For Review Only

1  
2  
3  
4  
5  
6  
7  
8  
9  
10  
11  
12  
13  
14  
15  
16  
17  
18  
19  
20  
21  
22  
23  
24  
25  
26  
27  
28  
29  
30  
31  
32  
33  
34  
35  
36  
37  
38  
39  
40  
41  
42  
43  
44  
45  
46  
47  
48  
49  
50  
51  
52  
53  
54  
55  
56  
57  
58  
59  
60





## Parental satisfaction questionnaire during COVID-19 pandemic

Hospital No:

This questionnaire is aimed at assessing whether you feel the coronavirus pandemic has affected your experience on NICU and bonding with your baby

1. How involved do you feel with the care of your baby (e.g. feeding, bathing, skin care, taking the temperature, changing the nappy)?
  - a. Not at all
  - b. A little involved
  - c. Quite Involved
  - d. Fully involved
2. Do you feel that the pandemic has affected the quality of time you spend with your baby?
  - a. Not at all
  - b. Improved quality of time
  - c. Disimproved quality of time
- 3a. Has the pandemic affected the amount of time you spend giving kangaroo care?
  - a. No at all
  - b. Increased
  - c. Decreased
  - d. Not applicable (please give a reason) \_\_\_\_\_
- 3b. How has the pandemic has affected the amount of time you spend breastfeeding your baby? (please specify if you have decided not to breastfeed)
  - a. Not at all
  - b. Increased
  - c. Decreased
  - d. Not applicable (please give a reason) \_\_\_\_\_
- 4 Are you satisfied with the updates from the medical and nursing staff regarding your baby?
  - a. Very unsatisfied
  - b. Unsatisfied
  - c. Moderately satisfied
  - d. Satisfied
  - e. Very satisfied

### Parental satisfaction questionnaire during COVID-19 pandemic

1  
2  
3  
4  
5  
6  
7  
8  
9  
10  
11  
12  
13  
14  
15  
16  
17  
18  
19  
20  
21  
22  
23  
24  
25  
26  
27  
28  
29  
30  
31  
32  
33  
34  
35  
36  
37  
38  
39  
40  
41  
42  
43  
44  
45  
46  
47  
48  
49  
50  
51  
52  
53  
54  
55  
56  
57  
58  
59  
60

- 5 How have you found coming to the hospital to visit your baby?
- a. Very difficult
  - b. Sometimes Difficult
  - c. Manageable
  - d. Easy

6 If you would like to add any comments or suggestions on any of the above, please complete the box below



Only

Go straight to content.



Medical  
Research  
Council

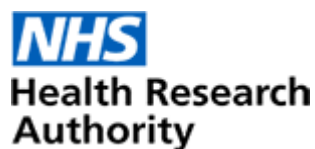

Is my study research?

**i** To print your result with title and IRAS Project ID please enter your details below:

Title of your research:

Assessing the impact of the Covid-19 pandemic on parental satisfaction in two European neonatal intensive care units

IRAS Project ID (if available):

You selected:

- **'No'** - Are the participants in your study randomised to different groups?
- **'No'** - Does your study protocol demand changing treatment/ patient care from accepted standards for any of the patients involved?
- **'No'** - Are your findings going to be generalisable?

**Your study would NOT be considered Research by the NHS.**

You may still need other approvals.

Researchers requiring further advice (e.g. those not confident with the outcome of this tool) should contact their R&D office or sponsor in the first instance, or the **HRA** to discuss your study. If contacting the HRA for advice, do this by sending an outline of the project (maximum one page), summarising its purpose, methodology, type of participant and planned location as well as a copy of this results page and a summary of the aspects of the decision(s) that you need further advice on to the HRA Queries Line at [Queries@hra.nhs.uk](mailto:Queries@hra.nhs.uk).

For more information please visit the [Defining Research](#) table.

[Follow this link to start again.](#)

NOTE: If using Internet Explorer please use browser print function.

[About this tool](#) [Feedback](#) [Contact](#) [Glossary](#) [Accessibility](#)
