# Supplementary material for: Assessing the impact of the COVID-19 pandemic on parental satisfaction in two European neonatal intensive care units
Source: PubMed Central journal article supplement — BMJ Paediatr Open. 2022 Sep 20;6(1):e001396. doi: 10.1136/bmjpo-2021-001396 (PMC9490299; doi:10.1136/bmjpo-2021-001396), 2022-09-20
Supplement: bmjpo-2021-001396supp002.pdf [file bmjpo-2021-001396supp002.pdf]

## Parental satisfaction questionnaire during COVID-19 pandemic

Hospital No:

This questionnaire is aimed at assessing whether you feel the coronavirus pandemic has affected your experience on NICU and bonding with your baby

1. How involved do you feel with the care of your baby (e.g. feeding, bathing, skin care, taking the temperature, changing the nappy)?
  - a. Not at all
  - b. A little involved
  - c. Quite Involved
  - d. Fully involved
  
2. Do you feel that the pandemic has affected the quality of time you spend with your baby?
  - a. Not at all
  - b. Improved quality of time
  - c. Disimproved quality of time
  
- 3a. Has the pandemic affected the amount of time you spend giving kangaroo care?
  - a. No at all
  - b. Increased
  - c. Decreased
  - d. Not applicable (please give a reason) \_\_\_\_\_
  
- 3b. How has the pandemic has affected the amount of time you spend breastfeeding your baby? (please specify if you have decided not to breastfeed)
  - a. Not at all
  - b. Increased
  - c. Decreased
  - d. Not applicable (please give a reason) \_\_\_\_\_
  
- 4 Are you satisfied with the updates from the medical and nursing staff regarding your baby?
  - a. Very unsatisfied
  - b. Unsatisfied
  - c. Moderately satisfied
  - d. Satisfied
  - e. Very satisfied

## Parental satisfaction questionnaire during COVID-19 pandemic

- 5 How have you found coming to the hospital to visit your baby?
- Very difficult
  - Sometimes Difficult
  - Manageable
  - Easy
- 6 If you would like to add any comments or suggestions on any of the above, please complete the box below
